# Supplementary material for: Assays for the Evaluation of the Immune Response to Marburg and Ebola Sudan Vaccination—Filovirus Animal Nonclinical Group Anti-Marburg Virus Glycoprotein Immunoglobulin G Enzyme-Linked Immunosorbent Assay and a Pseudovirion Neutralization Assay
Source: MDPI journal article supplement (doi:10.3390/vaccines10081211), 2022-07-29
Supplement: s1 [file s1]

Assays for the Evaluation of the Immune Response to Marburg and Ebola Sudan Vaccination – Filovirus Ani-mal Nonclinical Group anti-Marburg Virus Glycoprotein Immunoglobulin G Enzyme-Linked Immunosorbent As-say and a Pseudovirion Neutralization Assay

Supplementary Materials

**Table S1.** ELISA Results for MARV and SUDV Positive Serum Samples.

| <b>Virus</b> | <b>Sample ID</b> | <b>Concentration (ELISA Units/mL)</b> | <b>Reagent</b> |
|--------------|------------------|---------------------------------------|----------------|
| MARV         | MK3              | 6761.53                               | RS             |
| MARV         | MK6              | 8754.71                               | RS             |
| MARV         | MK2              | 2841.75                               | QC High        |
| MARV         | MK5              | 2362.63                               | QC High        |
| MARV         | MK8              | 2597.80                               | QC High        |
| MARV         | MK1              | 887.50                                | QC Low         |
| MARV         | MK4              | 672.21                                | QC Low         |
| SUDV         | G16              | 1568.40                               | RS             |
| SUDV         | L1               | 4224.76                               | RS             |
| SUDV         | G24              | 622.97                                | High           |
| SUDV         | G26              | 977.81                                | High           |
| SUDV         | G12              | 320.62                                | Low            |
| SUDV         | G21              | 347.46                                | Low            |
| SUDV         | G23              | 0.00                                  | NA             |
| SUDV         | G28              | 25.32                                 | NA             |
| SUDV         | G44              | 69.81                                 | NA             |
| SUDV         | G55              | 0.00                                  | NA             |
| SUDV         | L2               | 0.00                                  | NA             |

**Table S2.** Creation of Reference Standards and Quality Controls.

| <b>Virus</b> | <b>Reagent Type (Generation)</b> | <b>Lot Number</b> | <b>Composition</b> |
|--------------|----------------------------------|-------------------|--------------------|
| MARV         | RS (First)                       | BMIMARV101        | MK3 and MK6        |
| MARV         | RS (Second)                      | BMIMARV104        | MK6 and MK9        |
| MARV         | RS (Third)                       | BMIMARV107        | Tc Bovine          |
| MARV         | QC-High (First)                  | BMIMARV102        | MK2, MK5, and MK8  |
| MARV         | QC-High (Second)                 | BMIMARV105        | MK2 and MK4        |
| MARV         | QC-High (Third)                  | BMIMARV108        | Tc Bovine          |
| MARV         | QC-Low (First)                   | BMIMARV103        | MK1 and MK4        |
| MARV         | QC-Low (Second)                  | BMIMARV106        | MK5 and MK8        |
| MARV         | QC-Low (Third)                   | BMIMARV109        | Tc Bovine          |

|      |                  |            |             |
|------|------------------|------------|-------------|
| SUDV | RS (First)       | BMISUDV101 | G16 and L1  |
| SUDV | RS (Second)      | BMISUDV104 | Tc Bovine   |
| SUDV | QC-High (First)  | BMISUDV102 | G24 and G26 |
| SUDV | QC-High (Second) | BMISUDV105 | Tc Bovine   |
| SUDV | QC-Low (First)   | BMISUDV103 | G12 and G21 |
| SUDV | QC-Low (Second)  | BMISUDV106 | Tc Bovine   |

**Table S3.** Summary of Reference Standard, Quality Control, and Negative Control Lots.

| Virus Strain or Species | Reagent Type (Generation) | Lot Number | Concentration (ELISA Units/mL) | Acceptance Range (ELISA Units/mL) <sup>a</sup> |
|-------------------------|---------------------------|------------|--------------------------------|------------------------------------------------|
| MARV                    | RS (First)                | BMIMARV101 | 1,000 <sup>b</sup>             | NA                                             |
| MARV                    | RS (Second)               | BMIMARV104 | 936                            | NA                                             |
| MARV                    | RS (Third)                | BMIMARV107 | 1,058                          | NA                                             |
| MARV                    | QC-High (First)           | BMIMARV102 | 508.63                         | 254.31 – 762.94                                |
| MARV                    | QC-High (Second)          | BMIMARV105 | 464.13                         | 280.46 – 647.80                                |
| MARV                    | QC-High (Third)           | BMIMARV108 | 427.58                         | 218.88 – 636.28                                |
| MARV                    | QC-Low (First)            | BMIMARV103 | 121.48                         | 60.74 – 182.22                                 |
| MARV                    | QC-Low (Second)           | BMIMARV106 | 138.21                         | 77.08 – 199.34                                 |
| MARV                    | QC-Low (Third)            | BMIMARV109 | 156.09                         | 83.75 – 228.44                                 |
| SUDV                    | RS (First)                | BMISUDV101 | 1,000 <sup>b</sup>             | NA                                             |
| SUDV                    | RS (Second)               | BMISUDV104 | 1,143                          | NA                                             |
| SUDV                    | QC-High (First)           | BMISUDV102 | 212.57                         | 99.49 – 325.65                                 |
| SUDV                    | QC-High (Second)          | BMISUDV105 | 294.84                         | 203.62 – 386.06                                |
| SUDV                    | QC-Low (First)            | BMISUDV103 | 69.34                          | 36.66 – 102.01                                 |
| SUDV                    | QC-Low (Second)           | BMISUDV106 | 128.13                         | 89.55 – 166.71                                 |
| Human                   | NC                        | BMI529     | 0.00                           | OD ≤ 0.20                                      |
| Human                   | NC                        | BMI530     | 0.00                           | OD ≤ 0.20                                      |
| Human                   | NC                        | BMI547     | 0.00                           | OD ≤ 0.20                                      |
| NHP                     | NC                        | BMI298     | 0.00                           | OD ≤ 0.20                                      |
| NHP                     | NC                        | BMI300     | 0.00                           | OD ≤ 0.20                                      |
| NHP                     | NC                        | BMI304     | 0.00                           | OD ≤ 0.20                                      |

a – Mean ± 2 standard deviations.

b – Value was arbitrarily assigned.

NA = Not applicable

**Table S4.** Immune Serum Samples used to Generate QTSs.

| Virus Species | Serum ID              | Species | Approximate Concentration (ELISA Units/mL) |
|---------------|-----------------------|---------|--------------------------------------------|
| MARV          | FLV1001-100023 Day 71 | Human   | 1283.68                                    |
| MARV          | FLV1001-100068 Day 71 | Human   | 2267.29                                    |
| MARV          | FLV1001-100074 Day 71 | Human   | 3233.84                                    |
| MARV          | FLV1001-100014 Day 71 | Human   | 4828.04                                    |
| MARV          | FLV1001-100073 Day 71 | Human   | 2307.94                                    |

| <b>Virus Species</b> | <b>Serum ID</b>        | <b>Species</b> | <b>Approximate Concentration (ELISA Units/mL)</b> |
|----------------------|------------------------|----------------|---------------------------------------------------|
| MARV                 | 08110.28552.D70        | NHP            | 5160.49                                           |
| MARV                 | 08110.67181.D70        | NHP            | 5315.32                                           |
| MARV                 | 08110.09547.D70        | NHP            | 5351.43                                           |
| MARV                 | 08110.76302.D70        | NHP            | 6418.43                                           |
| MARV                 | 08110.19687.D70        | NHP            | 7469.17                                           |
| SUDV                 | FLV1001-100027 Day 78  | Human          | 13,143.20                                         |
| SUDV                 | FLV1001-100108 Day 113 | Human          | 5959.09                                           |
| SUDV                 | FLV1001-100041 Day 78  | Human          | 8241.61                                           |
| SUDV                 | FLV1001-100075 Day 78  | Human          | 4701.28                                           |
| SUDV                 | FLV1001-100097 Day 36  | Human          | 1848.99                                           |
| SUDV                 | 0740011.18305.D28      | NHP            | 1299.43                                           |
| SUDV                 | 08110.19687.D28        | NHP            | 806.77                                            |
| SUDV                 | 0740011.59335.D63      | NHP            | 5273.21                                           |
| SUDV                 | 0740011.84569.D70      | NHP            | 3358.48                                           |
| SUDV                 | 0740011.81800.D84      | NHP            | 2950.13                                           |

**Table S5. MARV Qualification Test Sample Dilutional Linearity Series Generation.**

| QTS Number  | Test Specimen ID      | Anti-GP IgG Concentration (ELISA Units/mL) (Before Spike) | Volume of Test Specimen (μL) | Dilution Factor (Spike) | Final Dilution Factor (Spike) | Negative Specimen Identifier (Diluent) | Volume of Negative Specimen Diluent (μL) | Total QTS Volume (μL) | Expected QTS Anti-GP IgG Concentration (ELISA Units/mL) | QTS Starting Dilution |
|-------------|-----------------------|-----------------------------------------------------------|------------------------------|-------------------------|-------------------------------|----------------------------------------|------------------------------------------|-----------------------|---------------------------------------------------------|-----------------------|
| 1           | FLV1001-100023 Day 71 | 1284                                                      | 270                          | 1:1                     | 1:1                           | NA                                     | 0                                        | 270                   | 1284                                                    | 1:100                 |
| 2           | Same as QTS 1         | 1284                                                      | -                            | -                       | -                             | NA                                     | -                                        | -                     | 1284                                                    | 1:200                 |
| 3           | Same as QTS 1         | 1284                                                      | -                            | -                       | -                             | NA                                     | -                                        | -                     | 1284                                                    | 1:50                  |
| 4           | FLV1001-100023 Day 71 | 1284                                                      | 125                          | 1:2                     | 1:2                           | BMI530                                 | 125                                      | 250                   | 642                                                     | 1:50                  |
| 5           | FLV1001-100023 Day 71 | 1284                                                      | 24                           | 1:5                     | 1:5                           | BMI530                                 | 96                                       | 120                   | 257                                                     | 1:50                  |
| 6           | FLV1001-100023 Day 71 | 1284                                                      | 30                           | 1:8                     | 1:8                           | BMI530                                 | 210                                      | 240                   | 160                                                     | 1:50                  |
| 7           | FLV1001-100023 Day 71 | 1284                                                      | 10                           | 1:16                    | 1:16                          | BMI530                                 | 150                                      | 160                   | 80                                                      | 1:50                  |
| 8 - Step 1  | FLV1001-100023 Day 71 | 1284                                                      | 5                            | 1:10                    | NA                            | BMI530                                 | 45                                       | 50                    | NA                                                      | NA                    |
| 8 - Final   | 8 - Step 1            | 128                                                       | 35                           | 1:8                     | 1:80                          | BMI530                                 | 245                                      | 280                   | 16                                                      | 1:50                  |
| 9 - Step 1  | FLV1001-100023 Day 71 | 1284                                                      | 3                            | 1:10                    | NA                            | BMI530                                 | 27                                       | 30                    | NA                                                      | NA                    |
| 9 - Final   | 9 - Step 1            | 128                                                       | 12                           | 1:10                    | 1:100                         | BMI530                                 | 108                                      | 120                   | 13                                                      | 1:50                  |
| 10 - Step 1 | FLV1001-100023 Day 71 | 1284                                                      | 2                            | 1:10                    | NA                            | BMI530                                 | 18                                       | 20                    | NA                                                      | NA                    |
| 10 - Final  | 10 - Step 1           | 128                                                       | 8                            | 1:15                    | 1:150                         | BMI530                                 | 112                                      | 120                   | 9                                                       | 1:50                  |
| 11          | FLV1001-100068 Day 71 | 2267                                                      | 120                          | 1:1                     | 1:1                           | NA                                     | 0                                        | 120                   | 2267                                                    | 1:100                 |
| 12          | FLV1001-100068 Day 71 | 2267                                                      | 135                          | 1:2                     | 1:2                           | BMI530                                 | 135                                      | 270                   | 1134                                                    | 1:100                 |
| 13          | Same as QTS 12        | 2267                                                      | -                            | -                       | -                             | -                                      | -                                        | -                     | 1134                                                    | 1:200                 |
| 14          | Same as QTS 12        | 2267                                                      | -                            | -                       | -                             | -                                      | -                                        | -                     | 1134                                                    | 1:50                  |
| 15          | FLV1001-100068 Day 71 | 2267                                                      | 30                           | 1:4                     | 1:4                           | BMI530                                 | 90                                       | 120                   | 567                                                     | 1:50                  |
| 16          | FLV1001-100068 Day 71 | 2267                                                      | 30                           | 1:8                     | 1:8                           | BMI530                                 | 210                                      | 240                   | 283                                                     | 1:50                  |
| 17          | FLV1001-100068 Day 71 | 2267                                                      | 15                           | 1:16                    | 1:16                          | BMI530                                 | 225                                      | 240                   | 142                                                     | 1:50                  |
| 18 - Step 1 | FLV1001-100068 Day 71 | 2267                                                      | 3                            | 1:10                    | NA                            | BMI530                                 | 27                                       | 30                    | NA                                                      | NA                    |
| 18 - Final  | 18 - Step 1           | 227                                                       | 20                           | 1:15                    | 1:150                         | BMI530                                 | 280                                      | 300                   | 15                                                      | 1:50                  |
| 19 - Step 1 | FLV1001-100068 Day 71 | 2267                                                      | 6                            | 1:15                    | NA                            | BMI530                                 | 84                                       | 90                    | NA                                                      | NA                    |
| 19 - Final  | 19 - Step 1           | 151                                                       | 12                           | 1:20                    | 1:300                         | BMI530                                 | 228                                      | 240                   | 8                                                       | 1:50                  |
| 20 - Step 1 | FLV1001-100068 Day 71 | 2267                                                      | 2                            | 1:20                    | NA                            | BMI530                                 | 38                                       | 40                    | NA                                                      | NA                    |
| 20 - Final  | 20 - Step 1           | 113                                                       | 10                           | 1:30                    | 1:600                         | BMI530                                 | 290                                      | 300                   | 4                                                       | 1:50                  |
| 21          | FLV1001-100074 Day 71 | 3234                                                      | 270                          | 1:1                     | 1:1                           | NA                                     | 0                                        | 270                   | 3234                                                    | 1:200                 |
| 22          | Same as QTS 21        | 3234                                                      | -                            | -                       | -                             | -                                      | -                                        | -                     | 3234                                                    | 1:400                 |
| 23          | Same as QTS 21        | 3234                                                      | -                            | -                       | -                             | -                                      | -                                        | -                     | 3234                                                    | 1:100                 |
| 24          | FLV1001-100074 Day 71 | 3234                                                      | 90                           | 1:3                     | 1:3                           | BMI530                                 | 180                                      | 270                   | 1078                                                    | 1:100                 |

| QTS Number  | Test Specimen ID      | Anti-GP IgG Concentration (ELISA Units/mL) (Before Spike) | Volume of Test Specimen (μL) | Dilution Factor (Spike) | Final Dilution Factor (Spike) | Negative Specimen Identifier (Diluent) | Volume of Negative Specimen Diluent (μL) | Total QTS Volume (μL) | Expected QTS Anti-GP IgG Concentration (ELISA Units/mL) | QTS Starting Dilution |
|-------------|-----------------------|-----------------------------------------------------------|------------------------------|-------------------------|-------------------------------|----------------------------------------|------------------------------------------|-----------------------|---------------------------------------------------------|-----------------------|
| 25          | FLV1001-100074 Day 71 | 3234                                                      | 24                           | 1:5                     | 1:5                           | BMI530                                 | 96                                       | 120                   | 647                                                     | 1:50                  |
| 26          | FLV1001-100074 Day 71 | 3234                                                      | 10                           | 1:25                    | 1:25                          | BMI530                                 | 240                                      | 250                   | 129                                                     | 1:50                  |
| 27 - Step 1 | FLV1001-100074 Day 71 | 3234                                                      | 3                            | 1:9                     | NA                            | BMI530                                 | 24                                       | 27                    | NA                                                      | NA                    |
| 27 - Final  | 27 - Step 1           | 359                                                       | 20                           | 1:6                     | 1:54                          | BMI530                                 | 100                                      | 120                   | 60                                                      | 1:50                  |
| 28 - Step 1 | FLV1001-100074 Day 71 | 3234                                                      | 2                            | 1:10                    | NA                            | BMI530                                 | 18                                       | 20                    | NA                                                      | NA                    |
| 28 - Final  | 28 - Step 1           | 323                                                       | 9                            | 1:20                    | 1:200                         | BMI530                                 | 171                                      | 180                   | 16                                                      | 1:50                  |
| 29 - Step 1 | FLV1001-100074 Day 71 | 3234                                                      | 2                            | 1:20                    | NA                            | BMI530                                 | 38                                       | 40                    | NA                                                      | NA                    |
| 29 - Final  | 29 - Step 1           | 162                                                       | 9                            | 1:20                    | 1:400                         | BMI530                                 | 171                                      | 180                   | 8                                                       | 1:50                  |
| 30 - Step 1 | FLV1001-100074 Day 71 | 3234                                                      | 2                            | 1:20                    | NA                            | BMI530                                 | 38                                       | 40                    | NA                                                      | NA                    |
| 30 - Final  | 30 - Step 1           | 162                                                       | 8                            | 1:40                    | 1:800                         | BMI530                                 | 312                                      | 320                   | 4                                                       | 1:50                  |
| 31          | FLV1001-100014 Day 71 | 4828                                                      | 270                          | 1:1                     | 1:1                           | NA                                     | 0                                        | 270                   | 4828                                                    | 1:200                 |
| 32          | Same as QTS 31        | 4828                                                      | -                            | -                       | -                             | -                                      | -                                        | -                     | 4828                                                    | 1:400                 |
| 33          | Same as QTS 31        | 4828                                                      | -                            | -                       | -                             | -                                      | -                                        | -                     | 4828                                                    | 1:100                 |
| 34          | FLV1001-100014 Day 71 | 4828                                                      | 40                           | 1:3                     | 1:3                           | BMI530                                 | 80                                       | 120                   | 1609                                                    | 1:100                 |
| 35          | FLV1001-100014 Day 71 | 4828                                                      | 20                           | 1:9                     | 1:9                           | BMI530                                 | 160                                      | 180                   | 536                                                     | 1:50                  |
| 36          | FLV1001-100014 Day 71 | 4828                                                      | 10                           | 1:27                    | 1:27                          | BMI530                                 | 260                                      | 270                   | 179                                                     | 1:50                  |
| 37 - Step 1 | FLV1001-100014 Day 71 | 4828                                                      | 10                           | 1:9                     | NA                            | BMI530                                 | 80                                       | 90                    | NA                                                      | NA                    |
| 37 - Final  | 37 - Step 1           | 536                                                       | 50                           | 1:6                     | 1:54                          | BMI530                                 | 250                                      | 300                   | 89                                                      | 1:50                  |
| 38 - Step 1 | FLV1001-100014 Day 71 | 4828                                                      | 2                            | 1:20                    | NA                            | BMI530                                 | 38                                       | 40                    | NA                                                      | NA                    |
| 38 - Final  | 38 - Step 1           | 241                                                       | 15                           | 1:20                    | 1:400                         | BMI530                                 | 285                                      | 300                   | 12                                                      | 1:50                  |
| 39 - Step 1 | FLV1001-100014 Day 71 | 4828                                                      | 2                            | 1:20                    | NA                            | BMI530                                 | 38                                       | 40                    | NA                                                      | NA                    |
| 39 - Final  | 39 - Step 1           | 241                                                       | 10                           | 1:30                    | 1:600                         | BMI530                                 | 290                                      | 300                   | 8                                                       | 1:50                  |
| 40 - Step 1 | FLV1001-100014 Day 71 | 4828                                                      | 2                            | 1:10                    | NA                            | BMI530                                 | 18                                       | 20                    | NA                                                      | NA                    |
| 40 - Step 2 | 40 - Step 1           | 483                                                       | 2                            | 1:10                    | NA                            | BMI530                                 | 18                                       | 20                    | NA                                                      | NA                    |
| 40 - Final  | 40 - Step 2           | 48                                                        | 25                           | 1:12                    | 1:1200                        | BMI530                                 | 275                                      | 300                   | 4                                                       | 1:50                  |
| 41          | FLV1001-100073 Day 71 | 2308                                                      | 250                          | 1:1                     | 1:1                           | NA                                     | 0                                        | 250                   | 2308                                                    | 1:300                 |
| 42          | FLV1001-100073 Day 71 | 2308                                                      | 150                          | 1:2                     | 1:2                           | BMI530                                 | 150                                      | 300                   | 1154                                                    | 1:100                 |
| 43          | Same as QTS 42        | 2308                                                      | -                            | -                       | -                             | -                                      | -                                        | -                     | 1154                                                    | 1:200                 |
| 44          | Same as QTS 42        | 2308                                                      | -                            | -                       | -                             | -                                      | -                                        | -                     | 1154                                                    | 1:50                  |
| 45          | FLV1001-100073 Day 71 | 2308                                                      | 30                           | 1:4                     | 1:4                           | BMI530                                 | 90                                       | 120                   | 577                                                     | 1:50                  |
| 46          | FLV1001-100073 Day 71 | 2308                                                      | 30                           | 1:8                     | 1:8                           | BMI530                                 | 210                                      | 240                   | 288                                                     | 1:50                  |

| QTS Number  | Test Specimen ID      | Anti-GP IgG Concentration (ELISA Units/mL) (Before Spike) | Volume of Test Specimen (µL) | Dilution Factor (Spike) | Final Dilution Factor (Spike) | Negative Specimen Identifier (Diluent) | Volume of Negative Specimen Diluent (µL) | Total QTS Volume (µL) | Expected QTS Anti-GP IgG Concentration (ELISA Units/mL) | QTS Starting Dilution |
|-------------|-----------------------|-----------------------------------------------------------|------------------------------|-------------------------|-------------------------------|----------------------------------------|------------------------------------------|-----------------------|---------------------------------------------------------|-----------------------|
| 47          | FLV1001-100073 Day 71 | 2308                                                      | 10                           | 1:16                    | 1:16                          | BMI530                                 | 150                                      | 160                   | 144                                                     | 1:50                  |
| 48 - Step 1 | FLV1001-100073 Day 71 | 2308                                                      | 3                            | 1:10                    | NA                            | BMI530                                 | 27                                       | 30                    | NA                                                      | NA                    |
| 48 - Final  | 48 - Step 1           | 231                                                       | 15                           | 1:20                    | 1:200                         | BMI530                                 | 285                                      | 300                   | 12                                                      | 1:50                  |
| 49 - Step 1 | FLV1001-100073 Day 71 | 2308                                                      | 2                            | 1:10                    | NA                            | BMI530                                 | 18                                       | 20                    | NA                                                      | NA                    |
| 49 - Final  | 49 - Step 1           | 231                                                       | 6                            | 1:30                    | 1:300                         | BMI530                                 | 174                                      | 180                   | 8                                                       | 1:50                  |
| 50 - Step 1 | FLV1001-100073 Day 71 | 2308                                                      | 2                            | 1:20                    | NA                            | BMI530                                 | 38                                       | 40                    | NA                                                      | NA                    |
| 50 - Final  | 50 - Step 1           | 115                                                       | 4                            | 1:40                    | 1:800                         | BMI530                                 | 156                                      | 160                   | 3                                                       | 1:50                  |
| 51          | 08110.28552.D70       | 5160                                                      | 120                          | 1:1                     | 1:1                           | NA                                     | 0                                        | 120                   | 5160                                                    | 1:600                 |
| 52          | 08110.28552.D70       | 5160                                                      | 60                           | 1:8                     | 1:8                           | BMI304                                 | 420                                      | 480                   | 645                                                     | 1:100                 |
| 53          | Same as QTS 52        | 5160                                                      | -                            | -                       | -                             | -                                      | -                                        | -                     | 645                                                     | 1:200                 |
| 54          | Same as QTS 52        | 5160                                                      | -                            | -                       | -                             | -                                      | -                                        | -                     | 645                                                     | 1:50                  |
| 55          | 08110.28552.D70       | 5160                                                      | 6                            | 1:20                    | 1:20                          | BMI304                                 | 114                                      | 120                   | 258                                                     | 1:50                  |
| 56          | 08110.28552.D70       | 5160                                                      | 12                           | 1:40                    | 1:40                          | BMI304                                 | 468                                      | 480                   | 129                                                     | 1:50                  |
| 57          | 08110.28552.D70       | 5160                                                      | 1.6                          | 1:100                   | 1:100                         | BMI304                                 | 158.4                                    | 160                   | 52                                                      | 1:50                  |
| 58 - Step 1 | 08110.28552.D70       | 5160                                                      | 4                            | 1:25                    | NA                            | BMI304                                 | 96                                       | 100                   | NA                                                      | NA                    |
| 58 - Final  | 58 - Step 1           | 206                                                       | 48                           | 1:10                    | 1:250                         | BMI304                                 | 432                                      | 480                   | 21                                                      | 1:50                  |
| 59 - Step 1 | 08110.28552.D70       | 5160                                                      | 3                            | 1:20                    | NA                            | BMI304                                 | 57                                       | 60                    | NA                                                      | NA                    |
| 59 - Final  | 59 - Step 1           | 258                                                       | 6                            | 1:20                    | 1:400                         | BMI304                                 | 114                                      | 120                   | 13                                                      | 1:50                  |
| 60 - Step 1 | 08110.28552.D70       | 5160                                                      | 2                            | 1:25                    | NA                            | BMI304                                 | 48                                       | 50                    | NA                                                      | NA                    |
| 60 - Final  | 60 - Step 1           | 206                                                       | 3                            | 1:40                    | 1:1000                        | BMI304                                 | 117                                      | 120                   | 5                                                       | 1:50                  |
| 61          | 08110.67181.D70       | 5315                                                      | 270                          | 1:1                     | NA                            | NA                                     | 0                                        | 270                   | 5315                                                    | 1:700                 |
| 62          | Same as QTS 61        | 5315                                                      | -                            | -                       | -                             | -                                      | -                                        | -                     | 5315                                                    | 1:1400                |
| 63          | Same as QTS 61        | 5315                                                      | -                            | -                       | -                             | -                                      | -                                        | -                     | 5315                                                    | 1:350                 |
| 64          | 08110.67181.D70       | 5315                                                      | 15                           | 1:8                     | 1:8                           | BMI304                                 | 105                                      | 120                   | 664                                                     | 1:50                  |
| 65          | 08110.67181.D70       | 5315                                                      | 6                            | 1:20                    | 1:20                          | BMI304                                 | 114                                      | 120                   | 266                                                     | 1:50                  |
| 66          | 08110.67181.D70       | 5315                                                      | 6                            | 1:40                    | 1:40                          | BMI304                                 | 234                                      | 240                   | 133                                                     | 1:50                  |
| 67          | 08110.67181.D70       | 5315                                                      | 2                            | 1:80                    | 1:80                          | BMI304                                 | 158                                      | 160                   | 66                                                      | 1:50                  |
| 68 - Step 1 | 08110.67181.D70       | 5315                                                      | 2                            | 1:10                    | NA                            | BMI304                                 | 18                                       | 20                    | NA                                                      | NA                    |
| 68 - Final  | 68 - Step 1           | 532                                                       | 6                            | 1:20                    | 1:200                         | BMI304                                 | 114                                      | 120                   | 27                                                      | 1:50                  |
| 69 - Step 1 | 08110.67181.D70       | 5315                                                      | 2                            | 1:20                    | NA                            | BMI304                                 | 38                                       | 40                    | NA                                                      | NA                    |
| 69 - Final  | 69 - Step 1           | 266                                                       | 12                           | 1:20                    | 1:400                         | BMI304                                 | 228                                      | 240                   | 13                                                      | 1:50                  |

| QTS Number  | Test Specimen ID | Anti-GP IgG Concentration (ELISA Units/mL) (Before Spike) | Volume of Test Specimen (µL) | Dilution Factor (Spike) | Final Dilution Factor (Spike) | Negative Specimen Identifier (Diluent) | Volume of Negative Specimen Diluent (µL) | Total QTS Volume (µL) | Expected QTS Anti-GP IgG Concentration (ELISA Units/mL) | QTS Starting Dilution |
|-------------|------------------|-----------------------------------------------------------|------------------------------|-------------------------|-------------------------------|----------------------------------------|------------------------------------------|-----------------------|---------------------------------------------------------|-----------------------|
| 70 - Step 1 | 08110.67181.D70  | 5315                                                      | 2                            | 1:20                    | NA                            | BMI304                                 | 38                                       | 40                    | NA                                                      | NA                    |
| 70 - Final  | 70 - Step 1      | 266                                                       | 8                            | 1:40                    | 1:800                         | BMI304                                 | 312                                      | 320                   | 7                                                       | 1:50                  |
| 71          | 08110.09547.D70  | 5351                                                      | 120                          | 1:1                     | 1:1                           | NA                                     | 0                                        | 120                   | 5351                                                    | 1:700                 |
| 72          | 08110.09547.D70  | 5351                                                      | 120                          | 1:4                     | 1:4                           | BMI304                                 | 360                                      | 480                   | 1338                                                    | 1:100                 |
| 73          | Same as QTS 72   | 5351                                                      | -                            | -                       | -                             | -                                      | -                                        | -                     | 1338                                                    | 1:200                 |
| 74          | Same as QTS 72   | 5351                                                      | -                            | -                       | -                             | -                                      | -                                        | -                     | 1338                                                    | 1:50                  |
| 75          | 08110.09547.D70  | 5351                                                      | 12                           | 1:10                    | 1:10                          | BMI304                                 | 108                                      | 120                   | 535                                                     | 1:50                  |
| 76          | 08110.09547.D70  | 5351                                                      | 13                           | 1:20                    | 1:20                          | BMI304                                 | 247                                      | 260                   | 268                                                     | 1:50                  |
| 77 - Step 1 | 08110.09547.D70  | 5351                                                      | 8                            | 1:5                     | NA                            | BMI304                                 | 32                                       | 40                    | NA                                                      | NA                    |
| 77 - Final  | 77 - Step 1      | 1070                                                      | 30                           | 1:10                    | 1:50                          | BMI304                                 | 270                                      | 300                   | 107                                                     | 1:50                  |
| 78 - Step 1 | 08110.09547.D70  | 5351                                                      | 2                            | 1:12                    | NA                            | BMI304                                 | 22                                       | 24                    | NA                                                      | NA                    |
| 78 - Final  | 78 - Step 1      | 446                                                       | 15                           | 1:20                    | 1:240                         | BMI304                                 | 285                                      | 300                   | 22                                                      | 1:50                  |
| 79 - Step 1 | 08110.09547.D70  | 5351                                                      | 2                            | 1:20                    | NA                            | BMI304                                 | 38                                       | 40                    | NA                                                      | NA                    |
| 79 - Final  | 79 - Step 1      | 268                                                       | 12                           | 1:25                    | 1:500                         | BMI304                                 | 288                                      | 300                   | 11                                                      | 1:50                  |
| 80 - Step 1 | 08110.09547.D70  | 5351                                                      | 2                            | 1:20                    | NA                            | BMI304                                 | 38                                       | 40                    | NA                                                      | NA                    |
| 80 - Final  | 80 - Step 1      | 268                                                       | 8                            | 1:40                    | 1:800                         | BMI304                                 | 312                                      | 320                   | 7                                                       | 1:50                  |
| 81          | 08110.76302.D70  | 6418                                                      | 270                          | 1:1                     | 1:1                           | NA                                     | 0                                        | 270                   | 6418                                                    | 1:300                 |
| 82          | Same as QTS 81   | 6418                                                      | -                            | -                       | -                             | -                                      | -                                        | -                     | 6418                                                    | 1:600                 |
| 83          | Same as QTS 81   | 6418                                                      | -                            | -                       | -                             | -                                      | -                                        | -                     | 6418                                                    | 1:150                 |
| 84          | 08110.76302.D70  | 6418                                                      | 12                           | 1:10                    | 1:10                          | BMI304                                 | 108                                      | 120                   | 642                                                     | 1:50                  |
| 85          | 08110.76302.D70  | 6418                                                      | 5                            | 1:25                    | 1:25                          | BMI304                                 | 120                                      | 125                   | 257                                                     | 1:50                  |
| 86          | 08110.76302.D70  | 6418                                                      | 7                            | 1:45                    | 1:45                          | BMI304                                 | 308                                      | 315                   | 143                                                     | 1:50                  |
| 87 - Step 1 | 08110.76302.D70  | 6418                                                      | 4                            | 1:10                    | NA                            | BMI304                                 | 36                                       | 40                    | NA                                                      | NA                    |
| 87 - Final  | 87 - Step 1      | 642                                                       | 30                           | 1:10                    | 1:100                         | BMI304                                 | 270                                      | 300                   | 64                                                      | 1:50                  |
| 88 - Step 1 | 08110.76302.D70  | 6418                                                      | 4                            | 1:10                    | NA                            | BMI304                                 | 36                                       | 40                    | NA                                                      | NA                    |
| 88 - Final  | 88 - Step 1      | 642                                                       | 10                           | 1:30                    | 1:300                         | BMI304                                 | 290                                      | 300                   | 21                                                      | 1:50                  |
| 89 - Step 1 | 08110.76302.D70  | 6418                                                      | 2                            | 1:20                    | NA                            | BMI304                                 | 38                                       | 40                    | NA                                                      | NA                    |
| 89 - Final  | 89 - Step 1      | 321                                                       | 10                           | 1:30                    | 1:600                         | BMI304                                 | 290                                      | 300                   | 11                                                      | 1:50                  |
| 90 - Step 1 | 08110.76302.D70  | 6418                                                      | 4                            | 1:5                     | NA                            | BMI304                                 | 16                                       | 20                    | NA                                                      | NA                    |
| 90 - Step 2 | 90 - Step 1      | 1284                                                      | 5                            | 1:10                    | NA                            | BMI304                                 | 45                                       | 50                    | NA                                                      | NA                    |
| 90 - Final  | 90 - Step 2      | 128                                                       | 15                           | 1:24                    | 1:1200                        | BMI304                                 | 345                                      | 360                   | 5                                                       | 1:50                  |

| QTS Number   | Test Specimen ID | Anti-GP IgG Concentration (ELISA Units/mL) (Before Spike) | Volume of Test Specimen (μL) | Dilution Factor (Spike) | Final Dilution Factor (Spike) | Negative Specimen Identifier (Diluent) | Volume of Negative Specimen Diluent (μL) | Total QTS Volume (μL) | Expected QTS Anti-GP IgG Concentration (ELISA Units/mL) | QTS Starting Dilution |
|--------------|------------------|-----------------------------------------------------------|------------------------------|-------------------------|-------------------------------|----------------------------------------|------------------------------------------|-----------------------|---------------------------------------------------------|-----------------------|
| 91           | 08110.19687.D70  | 7469                                                      | 300                          | 1:1                     | 1:1                           | NA                                     | 0                                        | 300                   | 7469                                                    | 1:400                 |
| 92           | 08110.19687.D70  | 7469                                                      | 90                           | 1:3                     | 1:3                           | BMI304                                 | 180                                      | 270                   | 2490                                                    | 1:100                 |
| 93           | Same as QTS 92   | 7469                                                      | -                            | -                       | -                             | -                                      | -                                        | -                     | 2490                                                    | 1:200                 |
| 94           | Same as QTS 92   | 7469                                                      | -                            | -                       | -                             | -                                      | -                                        | -                     | 2490                                                    | 1:50                  |
| 95           | 08110.19687.D70  | 7469                                                      | 20                           | 1:9                     | 1:9                           | BMI304                                 | 160                                      | 180                   | 830                                                     | 1:50                  |
| 96           | 08110.19687.D70  | 7469                                                      | 10                           | 1:27                    | 1:27                          | BMI304                                 | 260                                      | 270                   | 277                                                     | 1:50                  |
| 97 - Step 1  | 08110.19687.D70  | 7469                                                      | 2                            | 1:9                     | NA                            | BMI304                                 | 16                                       | 18                    | NA                                                      | NA                    |
| 97 - Final   | 97 - Step 1      | 830                                                       | 20                           | 1:6                     | 1:54                          | BMI304                                 | 100                                      | 120                   | 138                                                     | 1:50                  |
| 98 - Step 1  | 08110.19687.D70  | 7469                                                      | 2                            | 1:18                    | NA                            | BMI304                                 | 34                                       | 36                    | NA                                                      | NA                    |
| 98 - Final   | 98 - Step 1      | 415                                                       | 15                           | 1:20                    | 1:360                         | BMI304                                 | 285                                      | 300                   | 21                                                      | 1:50                  |
| 99 - Step 1  | 08110.19687.D70  | 7469                                                      | 2                            | 1:20                    | NA                            | BMI304                                 | 38                                       | 40                    | NA                                                      | NA                    |
| 99 - Final   | 99 - Step 1      | 373                                                       | 4                            | 1:30                    | 1:600                         | BMI304                                 | 116                                      | 120                   | 12                                                      | 1:50                  |
| 100 - Step 1 | 08110.19687.D70  | 7469                                                      | 2                            | 1:24                    | NA                            | BMI304                                 | 46                                       | 48                    | NA                                                      | NA                    |
| 100 - Final  | 100 - Step 1     | 311                                                       | 10                           | 1:48                    | 1:1152                        | BMI304                                 | 470                                      | 480                   | 6                                                       | 1:50                  |

**Table S6. SUDV Qualification Test Sample Dilutional Linearity Series Generation.**

| QTS Number  | Test Specimen ID       | Anti-GP IgG Concentration (ELISA Units/mL) (Before Spike) | Volume of Test Specimen (µL) | Dilution Factor (Spike) | Final Dilution Factor (Spike) | Negative Specimen Identifier (Diluent) | Volume of Negative Specimen Diluent (µL) | Total QTS Volume (µL) | Expected QTS Anti-GP IgG Concentration (ELISA Units/mL) | QTS Starting Dilution |
|-------------|------------------------|-----------------------------------------------------------|------------------------------|-------------------------|-------------------------------|----------------------------------------|------------------------------------------|-----------------------|---------------------------------------------------------|-----------------------|
| 1           | FLV1001-100027 Day 78  | 13143                                                     | 480                          | 1:1                     | 1:1                           | NA                                     | 0                                        | 480                   | 13143                                                   | 1:700                 |
| 2           | Same as QTS 1          | 13143                                                     | -                            | -                       | -                             | NA                                     | -                                        | -                     | 13143                                                   | 1:1400                |
| 3           | Same as QTS 1          | 13143                                                     | -                            | -                       | -                             | NA                                     | -                                        | -                     | 13143                                                   | 1:350                 |
| 4           | FLV1001-100027 Day 78  | 13143                                                     | 160                          | 1:2                     | 1:2                           | BMI530                                 | 160                                      | 320                   | 6572                                                    | 1:300                 |
| 5           | FLV1001-100027 Day 78  | 13143                                                     | 40                           | 1:5                     | 1:5                           | BMI530                                 | 160                                      | 200                   | 2629                                                    | 1:100                 |
| 6           | FLV1001-100027 Day 78  | 13143                                                     | 32                           | 1:10                    | 1:10                          | BMI530                                 | 288                                      | 320                   | 1314                                                    | 1:100                 |
| 7           | FLV1001-100027 Day 78  | 13143                                                     | 10                           | 1:20                    | 1:20                          | BMI530                                 | 190                                      | 200                   | 657                                                     | 1:50                  |
| 8 - Step 1  | FLV1001-100027 Day 78  | 13143                                                     | 4                            | 1:20                    | NA                            | BMI530                                 | 76                                       | 80                    | NA                                                      | NA                    |
| 8 - Final   | 8 - Step 1             | 657                                                       | 16                           | 1:20                    | 1:400                         | BMI530                                 | 304                                      | 320                   | 33                                                      | 1:50                  |
| 9 - Step 1  | FLV1001-100027 Day 78  | 13143                                                     | 4                            | 1:20                    | NA                            | BMI530                                 | 76                                       | 80                    | NA                                                      | NA                    |
| 9 - Final   | 9 - Step 1             | 657                                                       | 6                            | 1:40                    | 1:800                         | BMI530                                 | 234                                      | 240                   | 16                                                      | 1:50                  |
| 10 - Step 1 | FLV1001-100027 Day 78  | 13143                                                     | 5                            | 1:16                    | NA                            | BMI530                                 | 75                                       | 80                    | NA                                                      | NA                    |
| 10 - Final  | 10 - Step 1            | 821                                                       | 3                            | 1:100                   | 1:1600                        | BMI530                                 | 297                                      | 300                   | 8                                                       | 1:50                  |
| 11          | FLV1001-100108 Day 113 | 5959                                                      | 200                          | 1:1                     | 1:1                           | NA                                     | 0                                        | 200                   | 5959                                                    | 1:300                 |
| 12          | FLV1001-100108 Day 113 | 5959                                                      | 120                          | 1:4                     | 1:4                           | BMI530                                 | 360                                      | 480                   | 1490                                                    | 1:100                 |
| 13          | Same as QTS 12         | 5959                                                      | -                            | -                       | -                             | -                                      | -                                        | -                     | 1490                                                    | 1:200                 |
| 14          | Same as QTS 12         | 5959                                                      | -                            | -                       | -                             | -                                      | -                                        | -                     | 1490                                                    | 1:50                  |
| 15          | FLV1001-100108 Day 113 | 5959                                                      | 25                           | 1:8                     | 1:8                           | BMI530                                 | 175                                      | 200                   | 745                                                     | 1:50                  |
| 16          | FLV1001-100108 Day 113 | 5959                                                      | 30                           | 1:16                    | 1:16                          | BMI530                                 | 450                                      | 480                   | 372                                                     | 1:50                  |
| 17          | FLV1001-100108 Day 113 | 5959                                                      | 8                            | 1:30                    | 1:30                          | BMI530                                 | 232                                      | 240                   | 199                                                     | 1:50                  |
| 18 - Step 1 | FLV1001-100108 Day 113 | 5959                                                      | 8                            | 1:10                    | NA                            | BMI530                                 | 72                                       | 80                    | NA                                                      | NA                    |
| 18 - Final  | 18 - Step 1            | 596                                                       | 10                           | 1:20                    | 1:200                         | BMI530                                 | 190                                      | 200                   | 30                                                      | 1:50                  |
| 19 - Step 1 | FLV1001-100108 Day 113 | 5959                                                      | 5                            | 1:18                    | NA                            | BMI530                                 | 85                                       | 90                    | NA                                                      | NA                    |
| 19 - Final  | 19 - Step 1            | 331                                                       | 8                            | 1:25                    | 1:450                         | BMI530                                 | 192                                      | 200                   | 13                                                      | 1:50                  |
| 20 - Step 1 | FLV1001-100108 Day 113 | 5959                                                      | 4                            | 1:30                    | NA                            | BMI530                                 | 116                                      | 120                   | NA                                                      | NA                    |
| 20 - Final  | 20 - Step 1            | 199                                                       | 20                           | 1:25                    | 1:750                         | BMI530                                 | 480                                      | 500                   | 8                                                       | 1:50                  |
| 21          | FLV1001-100041 Day 78  | 8242                                                      | 480                          | 1:1                     | 1:1                           | NA                                     | 0                                        | 480                   | 8242                                                    | 1:400                 |
| 22          | Same as QTS 21         | 8242                                                      | -                            | -                       | -                             | -                                      | -                                        | -                     | 8242                                                    | 1:800                 |
| 23          | Same as QTS 21         | 8242                                                      | -                            | -                       | -                             | -                                      | -                                        | -                     | 8242                                                    | 1:200                 |
| 24          | FLV1001-100041 Day 78  | 8242                                                      | 72                           | 1:5                     | 1:5                           | BMI530                                 | 288                                      | 360                   | 1648                                                    | 1:100                 |

| QTS Number  | Test Specimen ID      | Anti-GP IgG Concentration (ELISA Units/mL) (Before Spike) | Volume of Test Specimen (µL) | Dilution Factor (Spike) | Final Dilution Factor (Spike) | Negative Specimen Identifier (Diluent) | Volume of Negative Specimen Diluent (µL) | Total QTS Volume (µL) | Expected QTS Anti-GP IgG Concentration (ELISA Units/mL) | QTS Starting Dilution |
|-------------|-----------------------|-----------------------------------------------------------|------------------------------|-------------------------|-------------------------------|----------------------------------------|------------------------------------------|-----------------------|---------------------------------------------------------|-----------------------|
| 25          | FLV1001-100041 Day 78 | 8242                                                      | 20                           | 1:10                    | 1:10                          | BMI530                                 | 180                                      | 200                   | 824                                                     | 1:50                  |
| 26          | FLV1001-100041 Day 78 | 8242                                                      | 18                           | 1:20                    | 1:20                          | BMI530                                 | 342                                      | 360                   | 412                                                     | 1:50                  |
| 27 - Step 1 | FLV1001-100041 Day 78 | 8242                                                      | 9                            | 1:20                    | NA                            | BMI530                                 | 171                                      | 180                   | NA                                                      | NA                    |
| 27 - Final  | 27 - Step 1           | 412                                                       | 100                          | 1:2                     | 1:40                          | BMI530                                 | 100                                      | 200                   | 206                                                     | 1:50                  |
| 28 - Step 1 | FLV1001-100041 Day 78 | 8242                                                      | 9                            | 1:10                    | NA                            | BMI530                                 | 81                                       | 90                    | NA                                                      | NA                    |
| 28 - Final  | 28 - Step 1           | 824                                                       | 10                           | 1:20                    | 1:200                         | BMI530                                 | 190                                      | 200                   | 41                                                      | 1:50                  |
| 29 - Step 1 | FLV1001-100041 Day 78 | 8242                                                      | 6                            | 1:20                    | NA                            | BMI530                                 | 114                                      | 120                   | NA                                                      | NA                    |
| 29 - Final  | 29 - Step 1           | 412                                                       | 8                            | 1:25                    | 1:500                         | BMI530                                 | 192                                      | 200                   | 16                                                      | 1:50                  |
| 30 - Step 1 | FLV1001-100041 Day 78 | 8242                                                      | 4                            | 1:25                    | NA                            | BMI530                                 | 96                                       | 100                   | NA                                                      | NA                    |
| 30 - Final  | 30 - Step 1           | 330                                                       | 5                            | 1:40                    | 1:1000                        | BMI530                                 | 195                                      | 200                   | 8                                                       | 1:50                  |
| 31          | FLV1001-100075 Day 78 | 4701                                                      | 480                          | 1:1                     | 1:1                           | NA                                     | 0                                        | 480                   | 4701                                                    | 1:200                 |
| 32          | Same as QTS 31        | 4701                                                      | -                            | -                       | -                             | -                                      | -                                        | -                     | 4701                                                    | 1:400                 |
| 33          | Same as QTS 31        | 4701                                                      | -                            | -                       | -                             | -                                      | -                                        | -                     | 4701                                                    | 1:100                 |
| 34          | FLV1001-100075 Day 78 | 4701                                                      | 80                           | 1:3                     | 1:3                           | BMI530                                 | 160                                      | 240                   | 1567                                                    | 1:100                 |
| 35          | FLV1001-100075 Day 78 | 4701                                                      | 30                           | 1:9                     | 1:9                           | BMI530                                 | 240                                      | 270                   | 522                                                     | 1:50                  |
| 36          | FLV1001-100075 Day 78 | 4701                                                      | 10                           | 1:36                    | 1:36                          | BMI530                                 | 350                                      | 360                   | 131                                                     | 1:50                  |
| 37 - Step 1 | FLV1001-100075 Day 78 | 4701                                                      | 20                           | 1:9                     | NA                            | BMI530                                 | 160                                      | 180                   | NA                                                      | NA                    |
| 37 - Final  | 37 - Step 1           | 522                                                       | 40                           | 1:6                     | 1:54                          | BMI530                                 | 200                                      | 240                   | 87                                                      | 1:50                  |
| 38 - Step 1 | FLV1001-100075 Day 78 | 4701                                                      | 12                           | 1:10                    | NA                            | BMI530                                 | 108                                      | 120                   | NA                                                      | NA                    |
| 38 - Final  | 38 - Step 1           | 470                                                       | 30                           | 1:20                    | 1:200                         | BMI530                                 | 570                                      | 600                   | 24                                                      | 1:50                  |
| 39 - Step 1 | FLV1001-100075 Day 78 | 4701                                                      | 12                           | 1:10                    | NA                            | BMI530                                 | 108                                      | 120                   | NA                                                      | NA                    |
| 39 - Final  | 39 - Step 1           | 470                                                       | 24                           | 1:30                    | 1:300                         | BMI530                                 | 696                                      | 720                   | 16                                                      | 1:50                  |
| 40 - Step 1 | FLV1001-100075 Day 78 | 4701                                                      | 12                           | 1:10                    | NA                            | BMI530                                 | 108                                      | 120                   | NA                                                      | NA                    |
| 40 - Step 2 | 40 - Step 1           | 470                                                       | 12                           | 1:10                    | NA                            | BMI530                                 | 108                                      | 120                   | NA                                                      | NA                    |
| 40 - Final  | 40 - Step 2           | 47                                                        | 120                          | 1:6                     | 1:600                         | BMI530                                 | 600                                      | 720                   | 8                                                       | 1:50                  |
| 41          | FLV1001-100097 Day 36 | 1849                                                      | 400                          | 1:1                     | 1:1                           | NA                                     | 0                                        | 400                   | 1849                                                    | 1:200                 |
| 42          | FLV1001-100097 Day 36 | 1849                                                      | 240                          | 1:2                     | 1:2                           | BMI530                                 | 240                                      | 480                   | 924                                                     | 1:100                 |
| 43          | Same as QTS 42        | 1849                                                      | -                            | -                       | -                             | -                                      | -                                        | -                     | 924                                                     | 1:200                 |
| 44          | Same as QTS 42        | 1849                                                      | -                            | -                       | -                             | -                                      | -                                        | -                     | 924                                                     | 1:50                  |
| 45          | FLV1001-100097 Day 36 | 1849                                                      | 60                           | 1:4                     | 1:4                           | BMI530                                 | 180                                      | 240                   | 462                                                     | 1:50                  |
| 46          | FLV1001-100097 Day 36 | 1849                                                      | 45                           | 1:8                     | 1:8                           | BMI530                                 | 315                                      | 360                   | 231                                                     | 1:50                  |

| QTS Number  | Test Specimen ID      | Anti-GP IgG Concentration (ELISA Units/mL) (Before Spike) | Volume of Test Specimen (µL) | Dilution Factor (Spike) | Final Dilution Factor (Spike) | Negative Specimen Identifier (Diluent) | Volume of Negative Specimen Diluent (µL) | Total QTS Volume (µL) | Expected QTS Anti-GP IgG Concentration (ELISA Units/mL) | QTS Starting Dilution |
|-------------|-----------------------|-----------------------------------------------------------|------------------------------|-------------------------|-------------------------------|----------------------------------------|------------------------------------------|-----------------------|---------------------------------------------------------|-----------------------|
| 47          | FLV1001-100097 Day 36 | 1849                                                      | 15                           | 1:16                    | 1:16                          | BMI530                                 | 225                                      | 240                   | 116                                                     | 1:50                  |
| 48 - Step 1 | FLV1001-100097 Day 36 | 1849                                                      | 6                            | 1:10                    | NA                            | BMI530                                 | 54                                       | 60                    | NA                                                      | NA                    |
| 48 - Final  | 48 - Step 1           | 185                                                       | 24                           | 1:20                    | 1:200                         | BMI530                                 | 456                                      | 480                   | 9                                                       | 1:50                  |
| 49 - Step 1 | FLV1001-100097 Day 36 | 1849                                                      | 6                            | 1:10                    | NA                            | BMI530                                 | 54                                       | 60                    | NA                                                      | NA                    |
| 49 - Final  | 49 - Step 1           | 185                                                       | 16                           | 1:15                    | 1:150                         | BMI530                                 | 224                                      | 240                   | 12                                                      | 1:50                  |
| 50 - Step 1 | FLV1001-100097 Day 36 | 1849                                                      | 6                            | 1:10                    | NA                            | BMI530                                 | 54                                       | 60                    | NA                                                      | NA                    |
| 50 - Final  | 50 - Step 1           | 185                                                       | 8                            | 1:30                    | 1:300                         | BMI530                                 | 232                                      | 240                   | 6                                                       | 1:50                  |
| 51          | 0740011.18305.D28     | 1299                                                      | 400                          | 1:1                     | 1:1                           | NA                                     | 0                                        | 400                   | 1299                                                    | 1:200                 |
| 52          | 0740011.18305.D28     | 1299                                                      | 330                          | 1:2                     | 1:2                           | BMI304                                 | 330                                      | 660                   | 650                                                     | 1:100                 |
| 53          | Same as QTS 52        | 1299                                                      | -                            | -                       | -                             | -                                      | -                                        | -                     | 650                                                     | 1:200                 |
| 54          | Same as QTS 52        | 1299                                                      | -                            | -                       | -                             | -                                      | -                                        | -                     | 650                                                     | 1:50                  |
| 55          | 0740011.18305.D28     | 1299                                                      | 100                          | 1:4                     | 1:4                           | BMI304                                 | 300                                      | 400                   | 325                                                     | 1:50                  |
| 56          | 0740011.18305.D28     | 1299                                                      | 75                           | 1:8                     | 1:8                           | BMI304                                 | 525                                      | 600                   | 162                                                     | 1:50                  |
| 57          | 0740011.18305.D28     | 1299                                                      | 25                           | 1:20                    | 1:20                          | BMI304                                 | 475                                      | 500                   | 65                                                      | 1:50                  |
| 58 - Step 1 | 0740011.18305.D28     | 1299                                                      | 50                           | 1:3                     | NA                            | BMI304                                 | 100                                      | 150                   | NA                                                      | NA                    |
| 58 - Final  | 58 - Step 1           | 433                                                       | 60                           | 1:10                    | 1:30                          | BMI304                                 | 540                                      | 600                   | 43                                                      | 1:50                  |
| 59 - Step 1 | 0740011.18305.D28     | 1299                                                      | 20                           | 1:8                     | NA                            | BMI304                                 | 140                                      | 160                   | NA                                                      | NA                    |
| 59 - Final  | 59 - Step 1           | 162                                                       | 72                           | 1:10                    | 1:80                          | BMI304                                 | 648                                      | 720                   | 16                                                      | 1:50                  |
| 60 - Step 1 | 0740011.18305.D28     | 1299                                                      | 15                           | 1:10                    | NA                            | BMI304                                 | 135                                      | 150                   | NA                                                      | NA                    |
| 60 - Final  | 60 - Step 1           | 130                                                       | 30                           | 1:20                    | 1:200                         | BMI304                                 | 570                                      | 600                   | 6                                                       | 1:50                  |
| 61          | 08110.19687.D28       | 807                                                       | 480                          | 1:1                     | NA                            | NA                                     | 0                                        | 480                   | 807                                                     | 1:100                 |
| 62          | Same as QTS 61        | 807                                                       | -                            | -                       | -                             | -                                      | -                                        | -                     | 807                                                     | 1:200                 |
| 63          | Same as QTS 61        | 807                                                       | -                            | -                       | -                             | -                                      | -                                        | -                     | 807                                                     | 1:50                  |
| 64          | 08110.19687.D28       | 807                                                       | 100                          | 1:2                     | 1:2                           | BMI304                                 | 100                                      | 200                   | 403                                                     | 1:50                  |
| 65          | 08110.19687.D28       | 807                                                       | 50                           | 1:4                     | 1:4                           | BMI304                                 | 150                                      | 200                   | 202                                                     | 1:50                  |
| 66          | 08110.19687.D28       | 807                                                       | 50                           | 1:8                     | 1:8                           | BMI304                                 | 350                                      | 400                   | 101                                                     | 1:50                  |
| 67          | 08110.19687.D28       | 807                                                       | 10                           | 1:20                    | 1:20                          | BMI304                                 | 190                                      | 200                   | 40                                                      | 1:50                  |
| 68 - Step 1 | 08110.19687.D28       | 807                                                       | 16                           | 1:10                    | NA                            | BMI304                                 | 144                                      | 160                   | NA                                                      | NA                    |
| 68 - Final  | 68 - Step 1           | 81                                                        | 50                           | 1:4                     | 1:40                          | BMI304                                 | 150                                      | 200                   | 20                                                      | 1:50                  |
| 69 - Step 1 | 08110.19687.D28       | 807                                                       | 30                           | 1:8                     | NA                            | BMI304                                 | 210                                      | 240                   | NA                                                      | NA                    |
| 69 - Final  | 69 - Step 1           | 101                                                       | 20                           | 1:10                    | 1:80                          | BMI304                                 | 180                                      | 200                   | 10                                                      | 1:50                  |

| QTS Number  | Test Specimen ID  | Anti-GP IgG Concentration (ELISA Units/mL) (Before Spike) | Volume of Test Specimen (µL) | Dilution Factor (Spike) | Final Dilution Factor (Spike) | Negative Specimen Identifier (Diluent) | Volume of Negative Specimen Diluent (µL) | Total QTS Volume (µL) | Expected QTS Anti-GP IgG Concentration (ELISA Units/mL) | QTS Starting Dilution |
|-------------|-------------------|-----------------------------------------------------------|------------------------------|-------------------------|-------------------------------|----------------------------------------|------------------------------------------|-----------------------|---------------------------------------------------------|-----------------------|
| 70 - Step 1 | 08110.19687.D28   | 807                                                       | 16                           | 1:20                    | NA                            | BMI304                                 | 304                                      | 320                   | NA                                                      | NA                    |
| 70 - Final  | 70 - Step 1       | 40                                                        | 50                           | 1:8                     | 1:160                         | BMI304                                 | 350                                      | 400                   | 5                                                       | 1:50                  |
| 71          | 0740011.59335.D63 | 5273                                                      | 400                          | 1:1                     | 1:1                           | NA                                     | 0                                        | 400                   | 5273                                                    | 1:700                 |
| 72          | 0740011.59335.D63 | 5273                                                      | 300                          | 1:4                     | 1:4                           | BMI304                                 | 900                                      | 1200                  | 1318                                                    | 1:100                 |
| 73          | Same as QTS 72    | 5273                                                      | -                            | -                       | -                             | -                                      | -                                        | -                     | 1318                                                    | 1:200                 |
| 74          | Same as QTS 72    | 5273                                                      | -                            | -                       | -                             | -                                      | -                                        | -                     | 1318                                                    | 1:50                  |
| 75          | 0740011.59335.D63 | 5273                                                      | 45                           | 1:10                    | 1:10                          | BMI304                                 | 405                                      | 450                   | 527                                                     | 1:50                  |
| 76          | 0740011.59335.D63 | 5273                                                      | 27                           | 1:20                    | 1:20                          | BMI304                                 | 513                                      | 540                   | 264                                                     | 1:50                  |
| 77 - Step 1 | 0740011.59335.D63 | 5273                                                      | 36                           | 1:5                     | NA                            | BMI304                                 | 144                                      | 180                   | NA                                                      | NA                    |
| 77 - Final  | 77 - Step 1       | 1055                                                      | 54                           | 1:10                    | 1:50                          | BMI304                                 | 486                                      | 540                   | 105                                                     | 1:50                  |
| 78 - Step 1 | 0740011.59335.D63 | 5273                                                      | 18                           | 1:20                    | NA                            | BMI304                                 | 342                                      | 360                   | NA                                                      | NA                    |
| 78 - Final  | 78 - Step 1       | 264                                                       | 27                           | 1:20                    | 1:400                         | BMI304                                 | 513                                      | 540                   | 13                                                      | 1:50                  |
| 79 - Step 1 | 0740011.59335.D63 | 5273                                                      | 15                           | 1:24                    | NA                            | BMI304                                 | 345                                      | 360                   | NA                                                      | NA                    |
| 79 - Final  | 79 - Step 1       | 220                                                       | 25                           | 1:24                    | 1:576                         | BMI304                                 | 575                                      | 600                   | 9                                                       | 1:50                  |
| 80 - Step 1 | 0740011.59335.D63 | 5273                                                      | 16                           | 1:30                    | NA                            | BMI304                                 | 464                                      | 480                   | NA                                                      | NA                    |
| 80 - Final  | 80 - Step 1       | 176                                                       | 18                           | 1:40                    | 1:1200                        | BMI304                                 | 702                                      | 720                   | 4                                                       | 1:50                  |
| 81          | 0740011.84569.D70 | 3358                                                      | 1200                         | 1:1                     | 1:1                           | NA                                     | 0                                        | 1200                  | 3358                                                    | 1:200                 |
| 82          | Same as QTS 81    | 3358                                                      | -                            | -                       | -                             | -                                      | -                                        | -                     | 3358                                                    | 1:400                 |
| 83          | Same as QTS 81    | 3358                                                      | -                            | -                       | -                             | -                                      | -                                        | -                     | 3358                                                    | 1:100                 |
| 84          | 0740011.84569.D70 | 3358                                                      | 45                           | 1:10                    | 1:10                          | BMI304                                 | 405                                      | 450                   | 336                                                     | 1:50                  |
| 85          | 0740011.84569.D70 | 3358                                                      | 18                           | 1:25                    | 1:25                          | BMI304                                 | 432                                      | 450                   | 134                                                     | 1:50                  |
| 86          | 0740011.84569.D70 | 3358                                                      | 12                           | 1:45                    | 1:45                          | BMI304                                 | 528                                      | 540                   | 75                                                      | 1:50                  |
| 87 - Step 1 | 0740011.84569.D70 | 3358                                                      | 18                           | 1:10                    | NA                            | BMI304                                 | 162                                      | 180                   | NA                                                      | NA                    |
| 87 - Final  | 87 - Step 1       | 336                                                       | 54                           | 1:10                    | 1:100                         | BMI304                                 | 486                                      | 540                   | 34                                                      | 1:50                  |
| 88 - Step 1 | 0740011.84569.D70 | 3358                                                      | 36                           | 1:10                    | NA                            | BMI304                                 | 324                                      | 360                   | NA                                                      | NA                    |
| 88 - Final  | 88 - Step 1       | 336                                                       | 18                           | 1:30                    | 1:300                         | BMI304                                 | 522                                      | 540                   | 11                                                      | 1:50                  |
| 89 - Step 1 | 0740011.84569.D70 | 3358                                                      | 24                           | 1:20                    | NA                            | BMI304                                 | 456                                      | 480                   | NA                                                      | NA                    |
| 89 - Final  | 89 - Step 1       | 168                                                       | 24                           | 1:30                    | 1:600                         | BMI304                                 | 696                                      | 720                   | 6                                                       | 1:50                  |
| 90 - Step 1 | 0740011.84569.D70 | 3358                                                      | 72                           | 1:5                     | NA                            | BMI304                                 | 288                                      | 360                   | NA                                                      | NA                    |
| 90 - Step 2 | 90 - Step 1       | 672                                                       | 48                           | 1:10                    | NA                            | BMI304                                 | 432                                      | 480                   | NA                                                      | NA                    |
| 90 - Final  | 90 - Step 2       | 67                                                        | 30                           | 1:24                    | 1:1200                        | BMI304                                 | 690                                      | 720                   | 3                                                       | 1:50                  |

| QTS Number   | Test Specimen ID  | Anti-GP IgG Concentration (ELISA Units/mL) (Before Spike) | Volume of Test Specimen (µL) | Dilution Factor (Spike) | Final Dilution Factor (Spike) | Negative Specimen Identifier (Diluent) | Volume of Negative Specimen Diluent (µL) | Total QTS Volume (µL) | Expected QTS Anti-GP IgG Concentration (ELISA Units/mL) | QTS Starting Dilution |
|--------------|-------------------|-----------------------------------------------------------|------------------------------|-------------------------|-------------------------------|----------------------------------------|------------------------------------------|-----------------------|---------------------------------------------------------|-----------------------|
| 91           | 0740011.81800.D84 | 2950                                                      | 400                          | 1:1                     | 1:1                           | NA                                     | 0                                        | 400                   | 2950                                                    | 1:100                 |
| 92           | 0740011.81800.D84 | 2950                                                      | 400                          | 1:3                     | 1:3                           | BMI304                                 | 800                                      | 1200                  | 983                                                     | 1:50                  |
| 93           | Same as QTS 92    | 2950                                                      | -                            | -                       | -                             | -                                      | -                                        | -                     | 983                                                     | 1:100                 |
| 94           | Same as QTS 92    | 2950                                                      | -                            | -                       | -                             | -                                      | -                                        | -                     | 983                                                     | 1:200                 |
| 95           | 0740011.81800.D84 | 2950                                                      | 75                           | 1:6                     | 1:6                           | BMI304                                 | 375                                      | 450                   | 492                                                     | 1:50                  |
| 96           | 0740011.81800.D84 | 2950                                                      | 45                           | 1:12                    | 1:12                          | BMI304                                 | 495                                      | 540                   | 246                                                     | 1:50                  |
| 97 - Step 1  | 0740011.81800.D84 | 2950                                                      | 30                           | 1:6                     | NA                            | BMI304                                 | 150                                      | 180                   | NA                                                      | NA                    |
| 97 - Final   | 97 - Step 1       | 492                                                       | 135                          | 1:4                     | 1:24                          | BMI304                                 | 405                                      | 540                   | 123                                                     | 1:50                  |
| 98 - Step 1  | 0740011.81800.D84 | 2950                                                      | 30                           | 1:12                    | NA                            | BMI304                                 | 330                                      | 360                   | NA                                                      | NA                    |
| 98 - Final   | 98 - Step 1       | 246                                                       | 54                           | 1:10                    | 1:120                         | BMI304                                 | 486                                      | 540                   | 25                                                      | 1:50                  |
| 99 - Step 1  | 0740011.81800.D84 | 2950                                                      | 30                           | 1:12                    | NA                            | BMI304                                 | 330                                      | 360                   | NA                                                      | NA                    |
| 99 - Final   | 99 - Step 1       | 246                                                       | 30                           | 1:20                    | 1:240                         | BMI304                                 | 570                                      | 600                   | 12                                                      | 1:50                  |
| 100 - Step 1 | 0740011.81800.D84 | 2950                                                      | 24                           | 1:20                    | NA                            | BMI304                                 | 456                                      | 480                   | NA                                                      | NA                    |
| 100 - Final  | 100 - Step 1      | 148                                                       | 36                           | 1:20                    | 1:400                         | BMI304                                 | 684                                      | 720                   | 7                                                       | 1:50                  |



**Table S9. Optimization of the Conjugate Dilution– MARV.**

|   | Conjugate Dilution (1:X)                             | Serum Dilution (1:X) |          |         |          |        |          |        |         |        |        |        |        |
|---|------------------------------------------------------|----------------------|----------|---------|----------|--------|----------|--------|---------|--------|--------|--------|--------|
|   |                                                      | 50                   | 100      | 200     | 400      | 800    | 1,600    | 3,200  | 6,400   | 12,800 | 25,600 | 51,200 | Blank  |
|   |                                                      | 1                    | 2        | 3       | 4        | 5      | 6        | 7      | 8       | 9      | 10     | 11     | 12     |
|   | Positive Serum (MK1)                                 |                      |          |         |          |        |          |        |         |        |        |        |        |
| A | 10,000                                               | 3.300                | 3.090    | 2.181   | 1.240    | 0.703  | 0.343    | 0.189  | 0.083   | 0.049  | 0.019  | 0.024  | -0.005 |
| B | 12,000                                               | 3.250                | 2.658    | 1.936   | 1.055    | 0.589  | 0.269    | 0.177  | 0.069   | 0.066  | 0.018  | 0.022  | -0.008 |
| C | 14,000                                               | 3.201                | 2.585    | 1.651   | 0.906    | 0.469  | 0.248    | 0.136  | 0.064   | 0.040  | 0.015  | 0.020  | 0.008  |
| D | 16,000                                               | 3.015                | 2.345    | 1.020   | 0.823    | 0.453  | 0.207    | 0.137  | 0.058   | 0.064  | 0.011  | 0.025  | -0.010 |
| E | 18,000                                               | 3.073                | 2.231    | 1.375   | 0.735    | 0.410  | 0.181    | 0.107  | 0.049   | 0.036  | 0.011  | 0.020  | 0.008  |
| F | 20,000                                               | 2.996                | 1.874    | 1.282   | 0.702    | 0.369  | 0.176    | 0.120  | 0.044   | 0.046  | 0.006  | 0.034  | -0.010 |
| G | 22,000                                               | 2.917                | 2.016    | 1.234   | 0.698    | 0.359  | 0.174    | 0.099  | 0.045   | 0.036  | 0.009  | 0.015  | 0.012  |
| H | Blank                                                | 0.007                | -0.002   | 0.022   | -0.012   | 0.015  | -0.014   | 0.022  | -0.003  | 0.016  | -0.008 | 0.029  | -0.015 |
|   | Negative Serum (BMI530)                              |                      |          |         |          |        |          |        |         |        |        |        |        |
| A | 10,000                                               | 0.056                | 0.026    | 0.070   | 0.077    | 0.049  | -0.002   | 0.010  | -0.003  | 0.008  | -0.004 | 0.009  | -0.004 |
| B | 12,000                                               | 0.020                | 0.000    | 0.023   | -0.009   | 0.023  | -0.010   | 0.029  | -0.004  | 0.029  | -0.004 | 0.017  | -0.010 |
| C | 14,000                                               | 0.048                | 0.010    | 0.014   | -0.002   | 0.013  | -0.003   | 0.012  | -0.001  | 0.011  | -0.004 | 0.009  | 0.006  |
| D | 16,000                                               | 0.035                | 0.003    | 0.024   | -0.010   | 0.020  | -0.011   | 0.026  | -0.002  | 0.034  | -0.003 | 0.015  | -0.008 |
| E | 18,000                                               | 0.034                | 0.010    | 0.015   | -0.001   | 0.011  | -0.003   | 0.012  | -0.001  | 0.009  | -0.003 | 0.009  | 0.005  |
| F | 20,000                                               | 0.015                | -0.003   | 0.022   | -0.013   | 0.020  | -0.011   | 0.027  | -0.006  | 0.026  | -0.005 | 0.031  | -0.009 |
| G | 22,000                                               | 0.016                | 0.009    | 0.014   | 0.002    | 0.010  | -0.002   | 0.013  | 0.002   | 0.009  | -0.002 | 0.008  | 0.008  |
| H | Blank                                                | 0.009                | -0.005   | 0.022   | -0.008   | 0.015  | -0.016   | 0.025  | -0.003  | 0.020  | -0.022 | 0.038  | -0.006 |
|   | Binding Ratios (Positive serum OD/Negative serum OD) |                      |          |         |          |        |          |        |         |        |        |        |        |
| A | 10,000                                               | 58.929               | 118.846  | 31.157  | 16.104   | 14.347 | -171.500 | 18.900 | -27.667 | 6.125  | -4.750 | 2.667  | 1.250  |
| B | 12,000                                               | 162.500              | NA       | 84.174  | -117.222 | 25.609 | -26.900  | 6.103  | -17.250 | 2.276  | -4.500 | 1.294  | 0.800  |
| C | 14,000                                               | 66.688               | 258.500  | 117.929 | -453.000 | 36.077 | -82.667  | 11.333 | -64.000 | 3.636  | -3.750 | 2.222  | 1.333  |
| D | 16,000                                               | 86.143               | 781.667  | 42.500  | -82.300  | 22.650 | -18.818  | 5.269  | -29.000 | 1.882  | -3.667 | 1.667  | 1.250  |
| E | 18,000                                               | 90.382               | 223.100  | 91.667  | -735.000 | 37.273 | -60.333  | 8.917  | -49.000 | 4.000  | -3.667 | 2.222  | 1.600  |
| F | 20,000                                               | 199.733              | -624.667 | 58.273  | -54.000  | 18.450 | -16.000  | 4.444  | -7.333  | 1.769  | -1.200 | 1.097  | 1.111  |
| G | 22,000                                               | 182.313              | 224.000  | 88.143  | 349.000  | 35.900 | -87.000  | 7.615  | 22.500  | 4.000  | -4.500 | 1.875  | 1.500  |
| H | Blank                                                | 0.778                | 0.400    | 1.000   | 1.500    | 1.000  | 0.875    | 0.880  | 1.000   | 0.800  | 0.364  | 0.763  | 2.500  |

**Table S10. Optimization of the Conjugate Dilution– SUDV.**

|   | Conjugate Dilution (1:X)                             | Serum Dilution (1:X) |          |         |          |        |          |        |          |        |         |        |        |
|---|------------------------------------------------------|----------------------|----------|---------|----------|--------|----------|--------|----------|--------|---------|--------|--------|
|   |                                                      | 50                   | 100      | 200     | 400      | 800    | 1,600    | 3,200  | 6,400    | 12,800 | 25,600  | 51,200 | Blank  |
|   |                                                      | 1                    | 2        | 3       | 4        | 5      | 6        | 7      | 8        | 9      | 10      | 11     | 12     |
|   | Positive Serum (G26)                                 |                      |          |         |          |        |          |        |          |        |         |        |        |
| A | 6,000                                                | 3.241                | 3.050    | 2.277   | 0.992    | 0.721  | 0.421    | 0.230  | 0.115    | 0.058  | 0.027   | 0.020  | 0.002  |
| B | 7,000                                                | 3.139                | 2.918    | 2.007   | 0.915    | 0.625  | 0.361    | 0.222  | 0.102    | 0.060  | 0.022   | 0.036  | -0.011 |
| C | 8,000                                                | 3.143                | 2.615    | 1.868   | 0.528    | 0.559  | 0.335    | 0.202  | 0.095    | 0.054  | 0.023   | 0.029  | 0.005  |
| D | 9,000                                                | 2.423                | 2.357    | 1.515   | 0.440    | 0.549  | 0.277    | 0.179  | 0.079    | 0.060  | 0.016   | 0.030  | -0.002 |
| E | 10,000                                               | 3.042                | 2.266    | 1.447   | 0.595    | 0.510  | 0.279    | 0.150  | 0.076    | 0.048  | 0.019   | 0.020  | 0.008  |
| F | 11,000                                               | 3.042                | 2.326    | 1.533   | 0.886    | 0.539  | 0.244    | 0.162  | 0.068    | 0.063  | 0.008   | 0.026  | -0.008 |
| G | 12,000                                               | 3.025                | 2.041    | 1.519   | 0.896    | 0.512  | 0.246    | 0.153  | 0.079    | 0.041  | 0.018   | 0.014  | 0.004  |
| H | Blank                                                | 0.006                | -0.016   | 0.022   | -0.008   | 0.019  | -0.014   | 0.028  | -0.004   | 0.018  | -0.004  | 0.003  | -0.009 |
|   | Negative Serum (BMI529)                              |                      |          |         |          |        |          |        |          |        |         |        |        |
| A | 6,000                                                | 0.019                | 0.011    | 0.016   | 0.001    | 0.011  | 0.000    | 0.009  | -0.001   | 0.008  | -0.004  | 0.006  | 0.003  |
| B | 7,000                                                | 0.031                | 0.006    | 0.021   | -0.004   | 0.019  | -0.005   | 0.022  | -0.001   | 0.021  | -0.003  | 0.024  | -0.006 |
| C | 8,000                                                | 0.030                | 0.014    | 0.015   | 0.000    | 0.010  | -0.001   | 0.009  | 0.000    | 0.009  | -0.002  | 0.003  | 0.006  |
| D | 9,000                                                | 0.029                | -0.008   | 0.027   | -0.006   | 0.029  | -0.005   | 0.020  | -0.005   | 0.021  | -0.008  | 0.020  | -0.004 |
| E | 10,000                                               | 0.036                | 0.011    | 0.015   | -0.001   | 0.010  | 0.000    | 0.010  | -0.001   | 0.010  | -0.003  | 0.010  | 0.005  |
| F | 11,000                                               | 0.039                | -0.005   | 0.027   | -0.009   | 0.028  | -0.011   | 0.029  | -0.002   | 0.025  | -0.015  | 0.036  | -0.011 |
| G | 12,000                                               | 0.025                | 0.013    | 0.015   | 0.002    | 0.006  | 0.000    | 0.008  | 0.001    | 0.003  | -0.003  | 0.006  | 0.008  |
| H | Blank                                                | 0.006                | -0.006   | 0.008   | 0.005    | 0.017  | -0.005   | 0.028  | -0.005   | 0.005  | 0.001   | 0.003  | -0.012 |
|   | Binding Ratios (Positive serum OD/Negative serum OD) |                      |          |         |          |        |          |        |          |        |         |        |        |
| A | 6,000                                                | 170.579              | 277.273  | 142.313 | 992.000  | 65.545 | NA       | 25.556 | -115.000 | 7.250  | -6.750  | 3.333  | 0.667  |
| B | 7,000                                                | 101.258              | 486.333  | 95.571  | -228.750 | 32.895 | -72.200  | 10.091 | -102.000 | 2.857  | -7.333  | 1.500  | 1.833  |
| C | 8,000                                                | 104.767              | 186.786  | 124.533 | #DIV/0!  | 55.900 | -335.000 | 22.444 | NA       | 6.000  | -11.500 | 9.667  | 0.833  |
| D | 9,000                                                | 83.552               | -294.625 | 56.111  | -73.333  | 18.931 | -55.400  | 8.950  | -15.800  | 2.857  | -2.000  | 1.500  | 0.500  |
| E | 10,000                                               | 84.500               | 206.000  | 96.467  | -595.000 | 51.000 | NA       | 15.000 | -76.000  | 4.800  | -6.333  | 2.000  | 1.600  |
| F | 11,000                                               | 78.000               | -465.200 | 56.778  | -98.444  | 19.250 | -22.182  | 5.586  | -34.000  | 2.520  | -0.533  | 0.722  | 0.727  |
| G | 12,000                                               | 121.000              | 157.000  | 101.267 | 448.000  | 85.333 | NA       | 19.125 | 79.000   | 13.667 | -6.000  | 2.333  | 0.500  |
| H | Blank                                                | 1.000                | 2.667    | 2.750   | -1.600   | 1.118  | 2.800    | 1.000  | 0.800    | 3.600  | -4.000  | 1.000  | 0.750  |

**Table S11. Potential Outliers Identified from Mixed Analysis of Variance Model – Human MARV.**

| Sample | Observed Value<br>(ELISA Units/mL) | Model-Predicted Value<br>(ELISA Units/mL) | Residual |
|--------|------------------------------------|-------------------------------------------|----------|
| QTS 2  | 3665.24                            | 1496.82                                   | 5.12     |
| QTS 26 | 172.52                             | 75.38                                     | 4.63     |
| QTS 32 | 2142.64                            | 4043.12                                   | -3.70    |
| QTS 40 | 1.79                               | 4.00                                      | -4.79    |
| QTS 48 | 25.81                              | 10.70                                     | 4.97     |

Outliers were included in statistical analysis.

**Table S12. Potential Outliers Identified from Mixed Analysis of Variance Model – NHP MARV.**

| Sample | Observed Value<br>(ELISA Units/mL) | Model-Predicted Value<br>(ELISA Units/mL) | Residual |
|--------|------------------------------------|-------------------------------------------|----------|
| QTS 88 | 6.83                               | 11.09                                     | -3.52    |
| QTS 98 | 5.44                               | 12.49                                     | -4.78    |

Outliers were included in statistical analysis.

**Table S13. Potential Outliers Identified from Mixed Analysis of Variance Model – Human SUDV.**

| Sample  | Observed Value<br>(ELISA Units/mL) | Model-Predicted Value<br>(ELISA Units/mL) | Residual |
|---------|------------------------------------|-------------------------------------------|----------|
| QTS 15* | 0.00                               | 287.43                                    | -12.50   |
| QTS 16* | 1,287.89                           | 489.21                                    | 5.84     |
| QTS 18* | 0.00                               | 16.91                                     | -6.25    |
| QTS 30^ | 4.55                               | 11.67                                     | -7.77    |
| QTS 30^ | 34.69                              | 13.53                                     | 7.77     |
| QTS 38^ | 10.44                              | 19.58                                     | -3.97    |

^Outliers were included in statistical analysis.

\*Outliers were excluded from statistical analysis.

**Table S14. Potential Outliers Identified from Mixed Analysis of Variance Model – NHP SUDV.**

| Sample | Observed Value<br>(ELISA Units/mL) | Model-Predicted Value<br>(ELISA Units/mL) | Residual |
|--------|------------------------------------|-------------------------------------------|----------|
| QTS 90 | 3.03                               | 5.99                                      | -5.15    |
| QTS 98 | 138.89                             | 72.83                                     | 4.84     |
| QTS 80 | 0.00                               | 6.34                                      | -10.07   |
| QTS 90 | 0.00                               | 6.07                                      | -9.49    |

Outliers were included in statistical analysis.

**Table S15. Geometric Mean Concentration and Percent Coefficient of Variation (%CV) by Dilutional Linearity Test Samples (QTS 1-50) – Human and MARV.**

| FLV1001-100023 Day 71 |    |                                               |                    | FLV1001-100068 Day 71 |    |                                               |                    | FLV1001-100074 Day 71 |    |                                               |                    |
|-----------------------|----|-----------------------------------------------|--------------------|-----------------------|----|-----------------------------------------------|--------------------|-----------------------|----|-----------------------------------------------|--------------------|
| QTS                   | N  | Geometric Mean Concentration (ELISA Units/mL) | %CV                | QTS                   | N  | Geometric Mean Concentration (ELISA Units/mL) | %CV                | QTS                   | N  | Geometric Mean Concentration (ELISA Units/mL) | %CV                |
| 1                     | 9  | 1226.80                                       | 22.7               | 11                    | 8  | 1746.33                                       | 20.5               | 21                    | 8  | 2328.23                                       | 20.8               |
| 2                     | 10 | 1351.80                                       | 49.2               | 12                    | 8  | 807.88                                        | 23.4               | 22                    | 8  | 2351.00                                       | 18.1               |
| 3                     | 9  | 1332.98                                       | 17.7               | 13                    | 8  | 805.66                                        | 35.4               | 23                    | 8  | 2407.99                                       | 40.6               |
| 4                     | 17 | 628.59                                        | 26.9               | 14                    | 8  | 841.55                                        | 25.5               | 24                    | 18 | 759.08                                        | 36.3               |
| 5                     | 9  | 219.13                                        | 23.5               | 15                    | 8  | 376.67                                        | 26.4               | 25                    | 8  | 473.33                                        | 22.0               |
| 6                     | 18 | 146.97                                        | 29.7               | 16                    | 21 | 186.95                                        | 32.8               | 26                    | 19 | 83.32                                         | 36.2               |
| 7                     | 9  | 65.18                                         | 19.3               | 17                    | 8  | 101.42 <sup>#</sup>                           | 27.6               | 27                    | 8  | 32.97                                         | 40.0               |
| 8                     | 20 | 12.98 <sup>#</sup>                            | 34.1               | 18                    | 8  | 8.53                                          | 118.7 <sup>*</sup> | 28                    | 8  | 10.58 <sup>#</sup>                            | 40.9               |
| 9                     | 9  | 5.86                                          | 138.9 <sup>*</sup> | 19                    | 7  | 2.49                                          | 172.8 <sup>*</sup> | 29                    | 8  | 1.98                                          | 102.0 <sup>*</sup> |
| 10                    | 9  | 3.88                                          | 235.4 <sup>*</sup> | 20                    | 16 | 1.14                                          | 53.1 <sup>*</sup>  | 30                    | 8  | 1.14                                          | 37.1               |
| FLV1001-100014 Day 71 |    |                                               |                    | FLV1001-100073 Day 71 |    |                                               |                    |                       |    |                                               |                    |
| QTS                   | N  | Geometric Mean Concentration (ELISA Units/mL) | %CV                | QTS                   | N  | Geometric Mean Concentration (ELISA Units/mL) | %CV                |                       |    |                                               |                    |
| 31                    | 8  | 5232.12 <sup>^</sup>                          | 19.9               | 41                    | 17 | 1291.02                                       | 19.4               |                       |    |                                               |                    |
| 32                    | 8  | 4287.67                                       | 45.1               | 42                    | 8  | 605.60                                        | 18.4               |                       |    |                                               |                    |
| 33                    | 8  | 4959.56                                       | 18.1               | 43                    | 8  | 632.11                                        | 18.2               |                       |    |                                               |                    |
| 34                    | 8  | 1436.65                                       | 20.3               | 44                    | 8  | 678.60                                        | 7.8                |                       |    |                                               |                    |
| 35                    | 8  | 503.91                                        | 19.5               | 45                    | 8  | 313.42                                        | 12.8               |                       |    |                                               |                    |
| 36                    | 16 | 161.58                                        | 29.7               | 46                    | 16 | 160.19                                        | 16.7               |                       |    |                                               |                    |
| 37                    | 8  | 76.69 <sup>#</sup>                            | 25.1               | 47                    | 8  | 80.28 <sup>#</sup>                            | 17.4               |                       |    |                                               |                    |
| 38                    | 8  | 9.04                                          | 121.4 <sup>*</sup> | 48                    | 17 | 5.85                                          | 179.2 <sup>*</sup> |                       |    |                                               |                    |
| 39                    | 8  | 4.83                                          | 136.3 <sup>*</sup> | 49                    | 8  | 1.69                                          | 132.1 <sup>*</sup> |                       |    |                                               |                    |
| 40                    | 16 | 1.86                                          | 105.8 <sup>*</sup> | 50                    | 8  | 1.26                                          | 74.3 <sup>*</sup>  |                       |    |                                               |                    |

Shaded cells reflect test samples with at least 95% detection rate (≥LOD).

<sup>\*</sup>%CV not acceptable (>50%).

<sup>#</sup>Geometric mean reportable value at the lowest-concentration sample with acceptable precision. Preliminary LLOQ is the median of these values across the five parent samples (76.69).

<sup>^</sup>Preliminary ULOQ.

**Table S16. Geometric Mean Concentration and Percent Coefficient of Variation (%CV) by Dilutional Linearity Test Samples (QTS 51-100) – NHP and MARV.**

| 08110.28552.D70 |    |                                               |        | 08110.67181.D70 |    |                                               |        | 08110.09547.D70 |    |                                               |        |
|-----------------|----|-----------------------------------------------|--------|-----------------|----|-----------------------------------------------|--------|-----------------|----|-----------------------------------------------|--------|
| QTS             | N  | Geometric Mean Concentration (ELISA Units/mL) | %CV    | QTS             | N  | Geometric Mean Concentration (ELISA Units/mL) | %CV    | QTS             | N  | Geometric Mean Concentration (ELISA Units/mL) | %CV    |
| 51              | 8  | 4118.17                                       | 25.5   | 61              | 8  | 4421.63                                       | 34.9   | 71              | 8  | 6096.25                                       | 6.3    |
| 52              | 8  | 477.66                                        | 15.5   | 62              | 8  | 4928.86                                       | 32.3   | 72              | 8  | 1564.86                                       | 14.7   |
| 53              | 8  | 475.71                                        | 31.1   | 63              | 8  | 4919.85                                       | 38.2   | 73              | 8  | 1644.12                                       | 18.2   |
| 54              | 16 | 468.88                                        | 30.1   | 64              | 8  | 585.86                                        | 28.4   | 74              | 17 | 1542.65                                       | 21.0   |
| 55              | 8  | 178.91                                        | 33.2   | 65              | 8  | 220.37                                        | 18.8   | 75              | 8  | 578.73                                        | 34.1   |
| 56              | 16 | 100.79                                        | 28.6   | 66              | 17 | 106.64                                        | 21.7   | 76              | 16 | 289.08                                        | 16.3   |
| 57              | 8  | 33.20 <sup>#</sup>                            | 24.6   | 67              | 8  | 58.98 <sup>#</sup>                            | 27.1   | 77              | 8  | 108.52                                        | 20.7   |
| 58              | 17 | 12.33                                         | 327.8* | 68              | 8  | 13.02                                         | 146.1* | 78              | 8  | 20.42 <sup>#</sup>                            | 28.0   |
| 59              | 8  | 3.65                                          | 157.1* | 69              | 8  | 12.76                                         | 39.7   | 79              | 8  | 4.46                                          | 212.9* |
| 60              | 8  | 1.30                                          | 82.4*  | 70              | 17 | 1.50                                          | 91.9*  | 80              | 8  | 0.00                                          | --     |
| 08110.76302.D70 |    |                                               |        | 08110.19687.D70 |    |                                               |        |                 |    |                                               |        |
| QTS             | N  | Geometric Mean Concentration (ELISA Units/mL) | %CV    | QTS             | N  | Geometric Mean Concentration (ELISA Units/mL) | %CV    |                 |    |                                               |        |
| 81              | 8  | 5449.96                                       | 24.7   | 91              | 16 | 6786.82                                       | 26.6   |                 |    |                                               |        |
| 82              | 8  | 6084.30                                       | 41.3   | 92              | 8  | 2032.97                                       | 28.0   |                 |    |                                               |        |
| 83              | 8  | 6898.26 <sup>^</sup>                          | 46.1   | 93              | 8  | 2444.31                                       | 20.7   |                 |    |                                               |        |
| 84              | 8  | 608.38                                        | 26.6   | 94              | 8  | 2189.53                                       | 25.5   |                 |    |                                               |        |
| 85              | 8  | 238.26                                        | 26.8   | 95              | 8  | 715.36                                        | 28.7   |                 |    |                                               |        |
| 86              | 16 | 142.08                                        | 20.9   | 96              | 16 | 217.13                                        | 15.8   |                 |    |                                               |        |
| 87              | 8  | 56.88                                         | 18.3   | 97              | 8  | 84.59                                         | 20.6   |                 |    |                                               |        |
| 88              | 8  | 14.15 <sup>#</sup>                            | 41.9   | 98              | 19 | 17.13 <sup>#</sup>                            | 35.9   |                 |    |                                               |        |
| 89              | 7  | 5.04                                          | 167.2* | 99              | 7  | 4.68                                          | 151.7* |                 |    |                                               |        |
| 90              | 16 | 1.25                                          | 84.0*  | 100             | 8  | 0.00                                          | --     |                 |    |                                               |        |

Shaded cells reflect test samples with at least 95% detection rate ( $\geq$ LOD).

\*%CV not acceptable (>50%).

\*\*%CV not acceptable (>50%) but test sample was included in overall precision/linearity analyses since QTS were near middle of assay range.

--All observations were zero and thus there was no variability.

<sup>#</sup>Geometric mean reportable value at the lowest-concentration sample with acceptable precision. Preliminary LLOQ is the median of these values across the five parent samples (20.42).

<sup>^</sup>Preliminary ULOQ

**Table S17. Geometric Mean Concentration and Percent Coefficient of Variation (%CV) by Dilutional Linearity Test Samples (QTS 1-50) – Human and SUDV.**

| FLV1001-100027 Day 78 |    |                                               |        | FLV1001-100108 Day 113 |    |                                               |        | FLV1001-100041 Day 78 |    |                                               |        |
|-----------------------|----|-----------------------------------------------|--------|------------------------|----|-----------------------------------------------|--------|-----------------------|----|-----------------------------------------------|--------|
| QTS                   | N  | Geometric Mean Concentration (ELISA Units/mL) | %CV    | QTS                    | N  | Geometric Mean Concentration (ELISA Units/mL) | %CV    | QTS                   | N  | Geometric Mean Concentration (ELISA Units/mL) | %CV    |
| 1                     | 8  | 11,542.60^                                    | 20.6   | 11                     | 8  | 7,108.14                                      | 15.4   | 21                    | 8  | 7,260.71                                      | 14.9   |
| 2                     | 8  | 10,938.70                                     | 18.7   | 12                     | 8  | 1,774.80                                      | 17.6   | 22                    | 8  | 7,463.71                                      | 16.1   |
| 3                     | 8  | 10,846.08                                     | 23.6   | 13                     | 8  | 1,887.89                                      | 22.3   | 23                    | 8  | 7,613.38                                      | 22.3   |
| 4                     | 16 | 5,788.16                                      | 18.5   | 14                     | 8  | 1,723.56                                      | 23.2   | 24                    | 16 | 1,446.39                                      | 23.6   |
| 5                     | 8  | 1,984.42                                      | 18.1   | 15                     | 7  | 811.01                                        | 14.8   | 25                    | 8  | 725.47                                        | 17.9   |
| 6                     | 16 | 1,095.72                                      | 23.1   | 16                     | 15 | 388.53                                        | 15.1   | 26                    | 17 | 341.01                                        | 16.7   |
| 7                     | 8  | 437.27                                        | 13.0   | 17                     | 8  | 231.45                                        | 24.7   | 27                    | 7  | 158.37                                        | 15.4   |
| 8                     | 17 | 22.70                                         | 19.6   | 18                     | 7  | 30.79                                         | 26.7   | 28                    | 6  | 31.26                                         | 20.7   |
| 9                     | 8  | 10.82 <sup>#</sup>                            | 35.4   | 19                     | 8  | 12.80 <sup>#</sup>                            | 34.2   | 29                    | 7  | 11.56 <sup>#</sup>                            | 26.7   |
| 10                    | 8  | 2.14                                          | 168.0* | 20                     | 16 | 6.09                                          | 98.5*  | 30                    | 8  | 1.88                                          | 231.1* |
| FLV1001-100075 Day 78 |    |                                               |        | FLV1001-100097 Day 36  |    |                                               |        |                       |    |                                               |        |
| QTS                   | N  | Geometric Mean Concentration (ELISA Units/mL) | %CV    | QTS                    | N  | Geometric Mean Concentration (ELISA Units/mL) | %CV    |                       |    |                                               |        |
| 31                    | 9  | 5,137.20                                      | 30.1   | 41                     | 16 | 1,558.09                                      | 49.3   |                       |    |                                               |        |
| 32                    | 9  | 4,840.60                                      | 11.7   | 42                     | 8  | 694.52                                        | 25.2   |                       |    |                                               |        |
| 33                    | 8  | 5,127.31                                      | 22.7   | 43                     | 8  | 752.50                                        | 45.1   |                       |    |                                               |        |
| 34                    | 8  | 1,684.33                                      | 11.5   | 44                     | 8  | 778.03                                        | 15.8   |                       |    |                                               |        |
| 35                    | 8  | 542.77                                        | 11.9   | 45                     | 8  | 369.31                                        | 22.4   |                       |    |                                               |        |
| 36                    | 16 | 111.71                                        | 20.3   | 46                     | 16 | 178.68                                        | 15.8   |                       |    |                                               |        |
| 37                    | 8  | 71.93                                         | 12.5   | 47                     | 8  | 80.28 <sup>#</sup>                            | 17.3   |                       |    |                                               |        |
| 38                    | 8  | 20.87                                         | 51.1*  | 48                     | 16 | 2.66                                          | 145.4* |                       |    |                                               |        |
| 39                    | 8  | 11.32 <sup>#</sup>                            | 25.7   | 49                     | 8  | 7.72                                          | 47.2   |                       |    |                                               |        |
| 40                    | 16 | 4.05                                          | 91.3*  | 50                     | 8  | 1.22                                          | 62.5*  |                       |    |                                               |        |

Shaded cells reflect test samples with at least 95% detection rate.

\*%CV not acceptable (>50%).

<sup>#</sup>Geometric mean reportable value at the lowest-concentration sample with acceptable precision. Preliminary LLOQ is the median of these values across the five parent samples (11.56).

<sup>^</sup>Preliminary ULOQ (11,542.60).

**Table S18. Geometric Mean Concentration and Percent Coefficient of Variation (%CV) by Dilutional Linearity Test Samples (QTS 51-100) – NHP and SUDV.**

| 0740011.18305.D28 |    |                                               |       | 08110.19687.D28   |    |                                               |      | 0740011.59335.D63 |    |                                               |        |
|-------------------|----|-----------------------------------------------|-------|-------------------|----|-----------------------------------------------|------|-------------------|----|-----------------------------------------------|--------|
| QTS               | N  | Geometric Mean Concentration (ELISA Units/mL) | %CV   | QTS               | N  | Geometric Mean Concentration (ELISA Units/mL) | %CV  | QTS               | N  | Geometric Mean Concentration (ELISA Units/mL) | %CV    |
| 51                | 7  | 4,743.80                                      | 24.9  | 61                | 7  | 2,594.15                                      | 36.3 | 71                | 9  | 17,199.09^                                    | 25.9   |
| 52                | 7  | 2,015.39                                      | 33.8  | 62                | 8  | 2,624.81                                      | 24.0 | 72                | 8  | 4,326.81                                      | 23.8   |
| 53                | 7  | 2,151.38                                      | 28.3  | 63                | 7  | 2,942.61                                      | 20.9 | 73                | 8  | 3,982.17                                      | 17.9   |
| 54                | 13 | 2,030.36                                      | 17.1  | 64                | 8  | 1,359.63                                      | 24.9 | 74                | 6  | 4,422.19                                      | 34.8   |
| 55                | 7  | 1,028.07                                      | 22.7  | 65                | 9  | 642.06                                        | 28.8 | 75                | 7  | 1,621.92                                      | 26.7   |
| 56                | 13 | 513.26                                        | 19.4  | 66                | 16 | 310.17                                        | 9.2  | 76                | 16 | 870.81                                        | 20.6   |
| 57                | 7  | 178.81                                        | 32.8  | 67                | 8  | 123.66                                        | 29.9 | 77                | 8  | 278.84                                        | 17.7   |
| 58                | 15 | 129.07                                        | 15.6  | 68                | 8  | 57.39                                         | 22.4 | 78                | 8  | 36.91                                         | 36.0   |
| 59                | 7  | 47.60                                         | 22.0  | 69                | 8  | 28.94                                         | 26.5 | 79                | 8  | 25.95#                                        | 36.7   |
| 60                | 6  | 18.10#                                        | 33.8  | 70                | 14 | 14.89#                                        | 36.9 | 80                | 8  | 9.71                                          | 122.4* |
| 0740011.84569.D70 |    |                                               |       | 0740011.81800.D84 |    |                                               |      |                   |    |                                               |        |
| QTS               | N  | Geometric Mean Concentration (ELISA Units/mL) | %CV   | QTS               | N  | Geometric Mean Concentration (ELISA Units/mL) | %CV  |                   |    |                                               |        |
| 81                | 7  | 11,564.66                                     | 23.5  | 91                | 7  | 14,489.14                                     | 37.8 |                   |    |                                               |        |
| 82                | 8  | 9,296.83                                      | 24.7  | 92                | 8  | 3,760.33                                      | 26.7 |                   |    |                                               |        |
| 83                | 3  | 10,324.04                                     | 16.0  | 93                | 9  | 3,611.04                                      | 24.0 |                   |    |                                               |        |
| 84                | 8  | 1,021.03                                      | 23.9  | 94                | 8  | 3,450.20                                      | 29.5 |                   |    |                                               |        |
| 85                | 8  | 405.69                                        | 18.1  | 95                | 9  | 1,812.92                                      | 18.2 |                   |    |                                               |        |
| 86                | 16 | 192.64                                        | 28.7  | 96                | 17 | 825.76                                        | 21.8 |                   |    |                                               |        |
| 87                | 8  | 91.32                                         | 30.3  | 97                | 8  | 433.95                                        | 15.2 |                   |    |                                               |        |
| 88                | 8  | 30.23                                         | 33.0  | 98                | 15 | 81.28                                         | 22.1 |                   |    |                                               |        |
| 89                | 8  | 18.55#                                        | 29.1  | 99                | 9  | 34.77                                         | 21.2 |                   |    |                                               |        |
| 90                | 16 | 7.28                                          | 81.5* | 100               | 9  | 23.00#                                        | 27.0 |                   |    |                                               |        |

Shaded cells reflect test samples with at least 95% detection rate.

\*%CV not acceptable (>50%).

#Geometric mean reportable value at the lowest-concentration sample with acceptable precision. Preliminary LLOQ is the median of these values across the five parent samples (18.55).

^Preliminary ULOQ (17,199.09).

**Table S19. Specificity Results – Human and MARV.**

| Test Sample            | Geometric Mean Across Days/Operators (ELISA Units/mL) |                |                |                | Ratio of Geometric Means Mock to Antigen |               |             |
|------------------------|-------------------------------------------------------|----------------|----------------|----------------|------------------------------------------|---------------|-------------|
|                        | Mock                                                  | rGP - 25 µg/mL | rGP - 10 µg/mL | CMV - 25 µg/mL | Mock / rGP25                             | Mock / rGP10  | Mock / CMV  |
| FLV1001-100041 Day 92  | 1348.82                                               | 4.21           | 9.97           | 1020.32        | 320.32                                   | 135.30        | 1.32        |
| FLV1001-100063 Day 71  | 1050.90                                               | 1.60           | 12.59          | 999.96         | 657.15                                   | 83.48         | 1.05        |
| FLV1001-100027 Day 92  | 873.75                                                | 3.52           | 35.21          | 721.60         | 248.30                                   | 24.81         | 1.21        |
| FLV1001-100102 Day 180 | 574.24                                                | 0.00           | 5.64           | 595.36         | --                                       | 101.86        | 0.96        |
| FLV1001-100005 Day 92  | 689.46                                                | 2.89           | 18.40          | 614.48         | 238.58                                   | 37.46         | 1.12        |
| <b>Mean</b>            |                                                       |                |                |                | <b>366.09</b>                            | <b>76.58</b>  | <b>1.13</b> |
| <b>90% Lower Bound</b> |                                                       |                |                |                | <b>133.77</b>                            | <b>33.04</b>  | <b>1.00</b> |
| <b>90% Upper Bound</b> |                                                       |                |                |                | <b>598.41</b>                            | <b>120.13</b> | <b>1.27</b> |

-- Geometric mean for antigen was zero, thus ratio could not be calculated.

**Table S20. Specificity Results – NHP and MARV.**

| Test Sample            | Geometric Mean Across Days/Operators (ELISA Units/mL) |                |                |                | Ratio of Geometric Means Mock to Antigen |              |             |
|------------------------|-------------------------------------------------------|----------------|----------------|----------------|------------------------------------------|--------------|-------------|
|                        | Mock                                                  | rGP - 25 µg/mL | rGP - 10 µg/mL | CMV - 25 µg/mL | Mock / rGP25                             | Mock / rGP10 | Mock / CMV  |
| 08110.39648.D88        | 669.67                                                | 1.20           | 18.47          | 595.86         | 559.36                                   | 36.25        | 1.12        |
| 08110.43742.D77        | 1459.87                                               | 5.67           | 74.02          | 1367.94        | 257.40                                   | 19.72        | 1.07        |
| 08110.52555.D70        | 2537.22                                               | 133.87         | 292.69         | 2369.40        | 18.95                                    | 8.67         | 1.07        |
| 08110.67181.D77        | 2507.72                                               | 175.27         | 241.87         | 2566.08        | 14.31                                    | 10.37        | 0.98        |
| 08110.92454.D77        | 2138.32                                               | 93.63          | 256.04         | 2099.94        | 22.84                                    | 8.35         | 1.02        |
| <b>Mean</b>            |                                                       |                |                |                | <b>174.57</b>                            | <b>16.67</b> | <b>1.05</b> |
| <b>90% Lower Bound</b> |                                                       |                |                |                | <b>0.00^</b>                             | <b>5.33</b>  | <b>1.00</b> |
| <b>90% Upper Bound</b> |                                                       |                |                |                | <b>402.12</b>                            | <b>28.01</b> | <b>1.10</b> |

^ Negative lower bound replaced with zero.

**Table S21. Specificity Results – Human and SUDV.**

| Test Sample            | Geometric Mean Across Days/Operators (ELISA Units/mL) |                |                |                | Ratio of Geometric Means Mock to Antigen |              |             |
|------------------------|-------------------------------------------------------|----------------|----------------|----------------|------------------------------------------|--------------|-------------|
|                        | Mock                                                  | rGP - 25 µg/mL | rGP - 10 µg/mL | CMV - 25 µg/mL | Mock / rGP25                             | Mock / rGP10 | Mock / CMV  |
| FLV1001-100027 Day 57  | 1,839.59                                              | 817.50         | 916.27         | 1,778.98       | 2.25                                     | 2.01         | 1.03        |
| FLV1001-100066 Day 78  | 1,365.14                                              | 181.20         | 264.01         | 1,277.97       | 7.53                                     | 5.17         | 1.07        |
| FLV1001-100116 Day 36  |                                                       |                |                |                |                                          |              |             |
| FLV1001-100103 Day 36  | 957.05                                                | 337.60         | 374.65         | 952.70         | 2.83                                     | 2.55         | 1.00        |
| FLV1001-100108 Day 92  | 745.21                                                | 284.61         | 326.53         | 702.76         | 2.62                                     | 2.28         | 1.06        |
| FLV1001-100090 Day 57  |                                                       |                |                |                |                                          |              |             |
| FLV1001-100111 Day 36  |                                                       |                |                |                |                                          |              |             |
| FLV1001-100108 Day 15  | 462.53                                                | 101.13         | 149.74         | 315.59         | 4.57                                     | 3.09         | 1.47        |
| <b>Mean</b>            |                                                       |                |                |                | <b>3.96</b>                              | <b>3.02</b>  | <b>1.13</b> |
| <b>90% Lower Bound</b> |                                                       |                |                |                | <b>1.88</b>                              | <b>1.81</b>  | <b>0.94</b> |
| <b>90% Upper Bound</b> |                                                       |                |                |                | <b>6.05</b>                              | <b>4.23</b>  | <b>1.31</b> |

**Table S22. Specificity Results – NHP and SUDV.**

| Test Sample            | Geometric Mean Across Days/Operators (ELISA Units/mL) |                |                  |                | Ratio of Geometric Means Mock to Antigen |              |             |
|------------------------|-------------------------------------------------------|----------------|------------------|----------------|------------------------------------------|--------------|-------------|
|                        | Mock                                                  | rGP - 25 µg/mL | rGP - 10 µg/mL   | CMV - 25 µg/mL | Mock / rGP25                             | Mock / rGP10 | Mock / CMV  |
| 080100.48343.D63       | 11,020.49                                             | 560.75         | 1,219.26         | 8,396.05       | 19.65                                    | 9.04         | 1.31        |
| 0740011.18305.D14      | 5,995.21                                              | 3,191.48       | 3,882.16         | 5,458.33       | 1.88                                     | 1.54         | 1.10        |
| 0740011.42672.D42      | 2,391.78                                              | 460.99         | 723.67 (779.13)* | 2,385.88       | 5.19                                     | 3.31         | 1.00        |
| 0740011.81800.D35      | 2,311.82                                              | --             | 733.98           | 2,332.21       | --                                       | 3.15         | 0.99        |
| 0740011.78934.D42      | 1,390.23                                              | 179.83         | 379.08           | 1,353.66       | 7.73                                     | 3.67         | 1.03        |
| <b>Mean</b>            |                                                       |                |                  |                | <b>8.61</b>                              | <b>4.14</b>  | <b>1.09</b> |
| <b>90% Lower Bound</b> |                                                       |                |                  |                | <b>0.00^</b>                             | <b>1.42</b>  | <b>0.96</b> |
| <b>90% Upper Bound</b> |                                                       |                |                  |                | <b>17.72</b>                             | <b>6.86</b>  | <b>1.21</b> |

-- No passing observations were available for the antigen.

^ Negative lower bound replaced with zero.

**Table S23. PsVNA Variability Estimates Obtained from Variance Components from Mixed Analysis of Variance Model.**

| Variance Component                                                  | % CV for PsVNT <sub>50</sub> |             |             |             | % CV for PsVNT <sub>80</sub> |             |             |             |
|---------------------------------------------------------------------|------------------------------|-------------|-------------|-------------|------------------------------|-------------|-------------|-------------|
|                                                                     | MARV                         |             | SUDV        |             | MARV                         |             | SUDV        |             |
|                                                                     | Human                        | NHP         | Human       | NHP         | Human                        | NHP         | Human       | NHP         |
| Operator                                                            | 16.9                         | 0.0         | 0.0         | 0.0         | 9.5                          | 0.0         | 0.0         | 4.7         |
| Day                                                                 | 6.3                          | 8.0         | 0.0         | 13.3        | 11.5                         | 15.2        | 0.0         | 10.3        |
| Plate                                                               | 6.9                          | 28.4        | 21.3        | 6.6         | 5.8                          | 23.5        | 15.4        | 6.1         |
| Intermediate Precision<br>(Sum of Operator,<br>Day, and Plate)      | 19.4                         | 29.6        | 21.3        | 14.8        | 16.1                         | 28.2        | 15.4        | 12.9        |
| Residual<br>(Repeatability)                                         | 21.5                         | 22.6        | 46.4        | 25.1        | 27.7                         | 26.1        | 43.1        | 19.3        |
| Total Assay<br>Variability                                          | 29.2                         | 37.8        | 52.0        | 29.4        | 32.4                         | 39.1        | 46.3        | 23.3        |
| Total Assay<br>Variability Range<br>Among Surrogate Test<br>Samples | 15.4 – 46.1                  | 26.5 – 54.8 | 34.2 – 59.1 | 23.4 – 34.7 | 17.3 – 56.6                  | 21.7 – 64.2 | 36.6 – 59.4 | 13.8 – 30.1 |

**Table S24. Human MARV PsVNA Control Acceptance Criteria.**

| Control                       | Parameter           | N  | Mean                 | Standard Deviation   | Acceptance Criteria                                                           |
|-------------------------------|---------------------|----|----------------------|----------------------|-------------------------------------------------------------------------------|
| Negative<br>(BMI547)          | PsVNT <sub>50</sub> | 60 | <LOD (4)             | -                    | <LOD (no dilution should result in a percent neutralization of 50% or higher) |
|                               | PsVNT <sub>80</sub> | 60 | <LOD (4)             | -                    |                                                                               |
| Positive<br>(MARV-Pos-110719) | PsVNT <sub>50</sub> | 43 | 1159                 | 401                  | 356 – 1962*                                                                   |
|                               | PsVNT <sub>80</sub> | 43 | 263                  | 81                   | 101 – 424*                                                                    |
| Cell Culture                  | Average RLU         | 80 | 260                  | 60                   | 100 – 600^                                                                    |
| PsV                           | Average RLU         | 80 | 1.98x10 <sup>6</sup> | 3.99x10 <sup>5</sup> | 1,000,000 – 3,500,000^                                                        |

\*Range or values shown = mean +/- 2 standard deviations.

^Ranges provided for RLU based acceptance criteria were expanded beyond the mean +/- 2 standard to account for variation among cell passages, maintain a minimum RLU value for the PsV control, and maintain consistency with assays using the same MARV PsV.

**Table S25. Human SUDV PsVNA Control Acceptance Criteria.**

| Control               | Parameter           | N  | Mean                 | Standard Deviation   | Acceptance Criteria                                                           |
|-----------------------|---------------------|----|----------------------|----------------------|-------------------------------------------------------------------------------|
| Negative (BMI547)     | PsVNT <sub>50</sub> | 60 | <LOD (4)             | -                    | <LOD (no dilution should result in a percent neutralization of 50% or higher) |
|                       | PsVNT <sub>80</sub> | 60 | <LOD (4)             | -                    |                                                                               |
| Positive (BMISUDV104) | PsVNT <sub>50</sub> | 45 | 307                  | 189                  | 20 – 686*                                                                     |
|                       | PsVNT <sub>80</sub> | 45 | 86                   | 37                   | 20 – 159*                                                                     |
| Cell Culture          | Average RLU         | 80 | 249                  | 55                   | 100 - 600^                                                                    |
| PsV                   | Average RLU         | 80 | 2.23x10 <sup>5</sup> | 1.07x10 <sup>5</sup> | 45,000 – 500,000^                                                             |

\*Range or values shown = mean +/- 2 standard deviations. Lower bound of the positive control acceptance criteria was set at 20 to ensure that positive controls have neutralization titers above values that could be interpreted as close to the theoretical LOD (e.g., PsVNT<sub>50</sub> or PsVNT<sub>80</sub> between 8 and 16).

^Ranges provided for RLU based acceptance criteria were expanded beyond the mean +/- 2 standard to account for variation among cell passages and to maintain a minimum RLU value for the PsV control.

**Table S26. NHP MARV PsVNA Control Acceptance Criteria.**

| Control               | Parameter           | N  | Mean                 | Standard Deviation   | Acceptance Criteria                                                           |
|-----------------------|---------------------|----|----------------------|----------------------|-------------------------------------------------------------------------------|
| Negative (BMI289)     | PsVNT <sub>50</sub> | 40 | <LOD (10)            | -                    | <LOD (no dilution should result in a percent neutralization of 50% or higher) |
|                       | PsVNT <sub>80</sub> | 40 | <LOD (10)            | -                    |                                                                               |
| Positive (022620-NHP) | PsVNT <sub>50</sub> | 37 | 935                  | 346                  | 243 – 1627*                                                                   |
|                       | PsVNT <sub>80</sub> | 37 | 264                  | 84                   | 96 – 432*                                                                     |
| Cell Culture          | Average RLU         | 80 | 249                  | 147                  | 100 - 600^                                                                    |
| PsV                   | Average RLU         | 80 | 2.23x10 <sup>6</sup> | 4.34x10 <sup>5</sup> | 1,000,000 – 3,500,000^                                                        |

\*Range or values shown = mean +/- 2 standard deviations. The lower bound of the Cell Culture acceptance criteria was set at 100 since a cell culture control value below 100 has never been observed.

^Ranges provided for RLU based acceptance criteria were expanded beyond the mean +/- 2 standard to account for variation among cell passages and to maintain a minimum RLU value for the PsV control.

**Table S27. NHP SUDV PSVNA Control Acceptance Criteria.**

| Control                | Parameter           | N  | Mean                 | Standard Deviation   | Acceptance Criteria                                                           |
|------------------------|---------------------|----|----------------------|----------------------|-------------------------------------------------------------------------------|
| Negative (BMI300)      | PsVNT <sub>50</sub> | 39 | <LOD (10)            | -                    | <LOD (no dilution should result in a percent neutralization of 50% or higher) |
|                        | PsVNT <sub>80</sub> | 39 | <LOD (10)            | -                    |                                                                               |
| Positive (NHP-SUDV-PC) | PsVNT <sub>50</sub> | 38 | 2440                 | 839                  | 762 – 4119*                                                                   |
|                        | PsVNT <sub>80</sub> | 38 | 1052                 | 244                  | 563 – 1541*                                                                   |
| Cell Culture           | Average RLU         | 80 | 239                  | 38                   | 100 - 600^                                                                    |
| PsV                    | Average RLU         | 39 | 8.56x10 <sup>5</sup> | 1.89x10 <sup>5</sup> | 45,000 – 1,500,000^                                                           |

\*Range or values shown = mean +/- 2 standard deviations.

^Ranges provided for RLU based acceptance criteria were expanded beyond the mean +/- 2 standard deviations to include the range of RLU values observed during development and characterization efforts. This expansion accounted for variation among cell passages and to maintain a minimum RLU value for the PsV control.

**Table S28. PsVNA Sample Acceptance Criteria.**

| Assay      | Parameter           | Acceptance Criteria* | Notes                                                                                                                                                                                                         |
|------------|---------------------|----------------------|---------------------------------------------------------------------------------------------------------------------------------------------------------------------------------------------------------------|
| Human MARV | PsVNT <sub>50</sub> | % CV ≤ 40            | Test samples that include replicates with values <LOD or 1 to 3-fold the LOD will not be subjected to the %CV value acceptance criteria (e.g., PsVNT <sub>50</sub> or PsVNT <sub>80</sub> between 8 and 24).  |
|            | PsVNT <sub>80</sub> | % CV ≤ 45            |                                                                                                                                                                                                               |
| Human SUDV | PsVNT <sub>50</sub> | % CV ≤ 60            |                                                                                                                                                                                                               |
|            | PsVNT <sub>80</sub> | % CV ≤ 60            |                                                                                                                                                                                                               |
| NHP MARV   | PsVNT <sub>50</sub> | % CV ≤ 55            | Test samples that include replicates with values <LOD or 1 to 3-fold the LOD will not be subjected to the %CV value acceptance criteria (e.g., PsVNT <sub>50</sub> or PsVNT <sub>80</sub> between 20 and 60). |
|            | PsVNT <sub>80</sub> | % CV ≤ 55            |                                                                                                                                                                                                               |
| NHP SUDV   | PsVNT <sub>50</sub> | % CV ≤ 35            |                                                                                                                                                                                                               |
|            | PsVNT <sub>80</sub> | % CV ≤ 35            |                                                                                                                                                                                                               |

\*Based on Total Assay Variability.
